# Supplementary material for: SFox imidates as versatile glycosyl donors for chemical glycosylation
Source: Royal Society of Chemistry journal article supplement (doi:10.1039/d4ob00679h), 2024-01-01
Supplement: d4ob00679h1.pdf [file d4ob00679h1.pdf]

## **Supporting Information**

### **SFox imidates as versatile glycosyl donors for chemical glycosylation**

Alessandra Damico,<sup>a</sup> Ganesh Shrestha,<sup>b</sup> Anupama Das,<sup>a</sup> Keith J. Stine,<sup>b</sup> and Alexei V. Demchenko<sup>a,b,\*</sup>

<sup>a</sup> Department of Chemistry, Saint Louis University, 3501 Laclede Ave, St. Louis, Missouri, 63103, USA; e-mail: [alexei.demchenko@slu.edu](mailto:alexei.demchenko@slu.edu)

<sup>b</sup> Department of Chemistry and Biochemistry, University of Missouri – St. Louis, One University Boulevard, St. Louis, Missouri 63121, USA

### **Contents:**

|                                                   |     |
|---------------------------------------------------|-----|
| NMR spectra of new compounds                      | S2  |
| <sup>1</sup> H NMR spectra of known disaccharides | S25 |

## NMR Spectra of new compounds

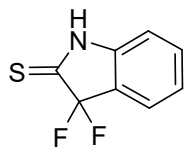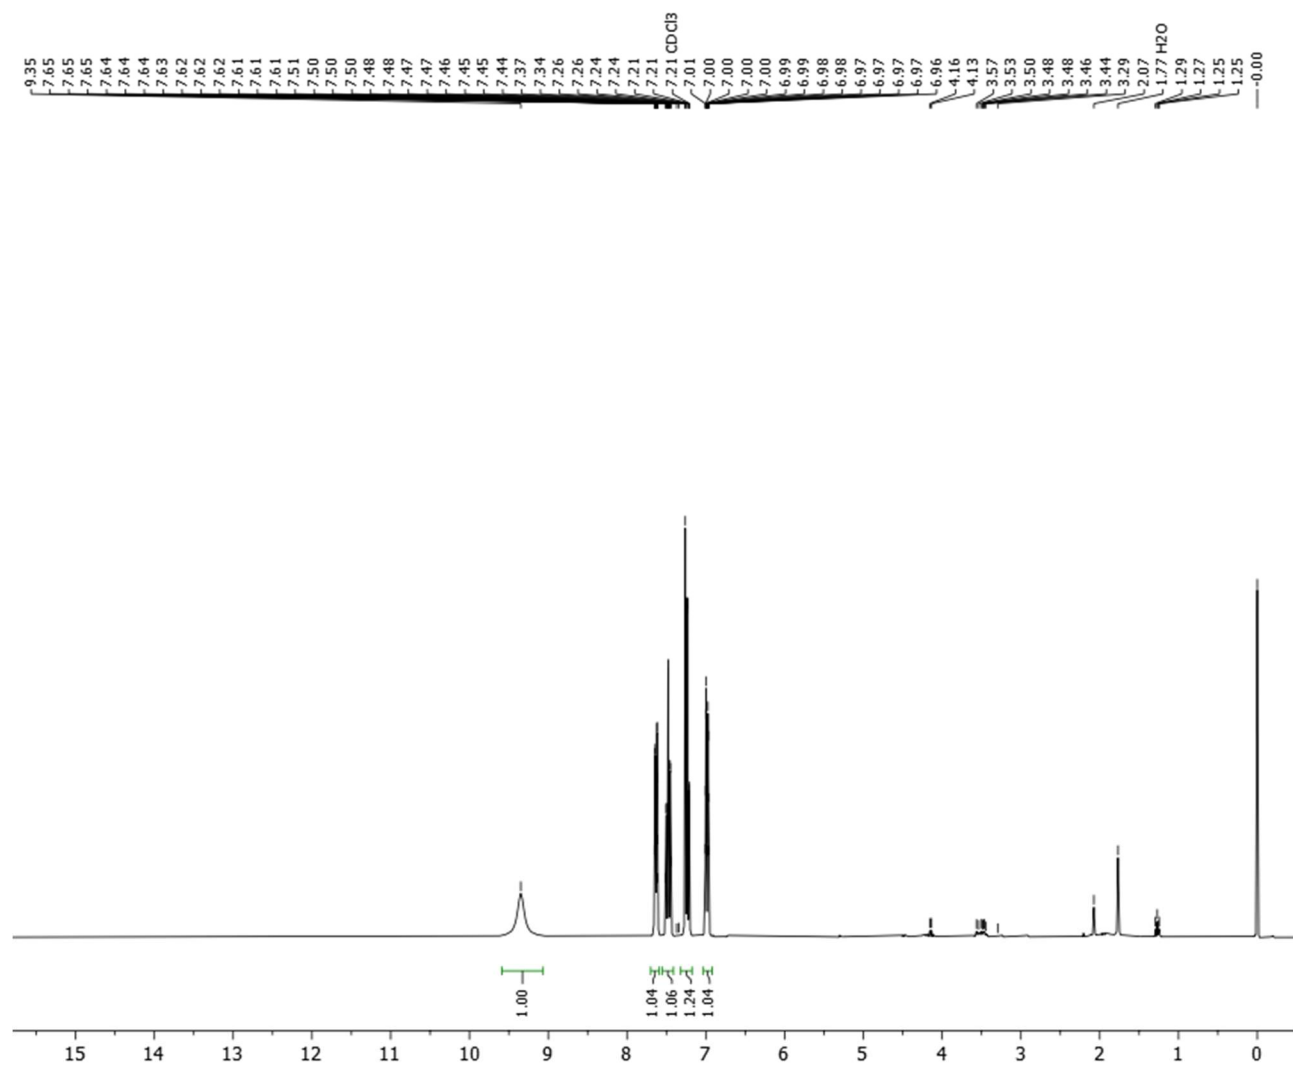

<sup>1</sup>H NMR (300 MHz, CDCl<sub>3</sub>)

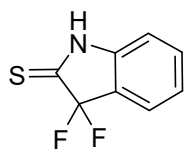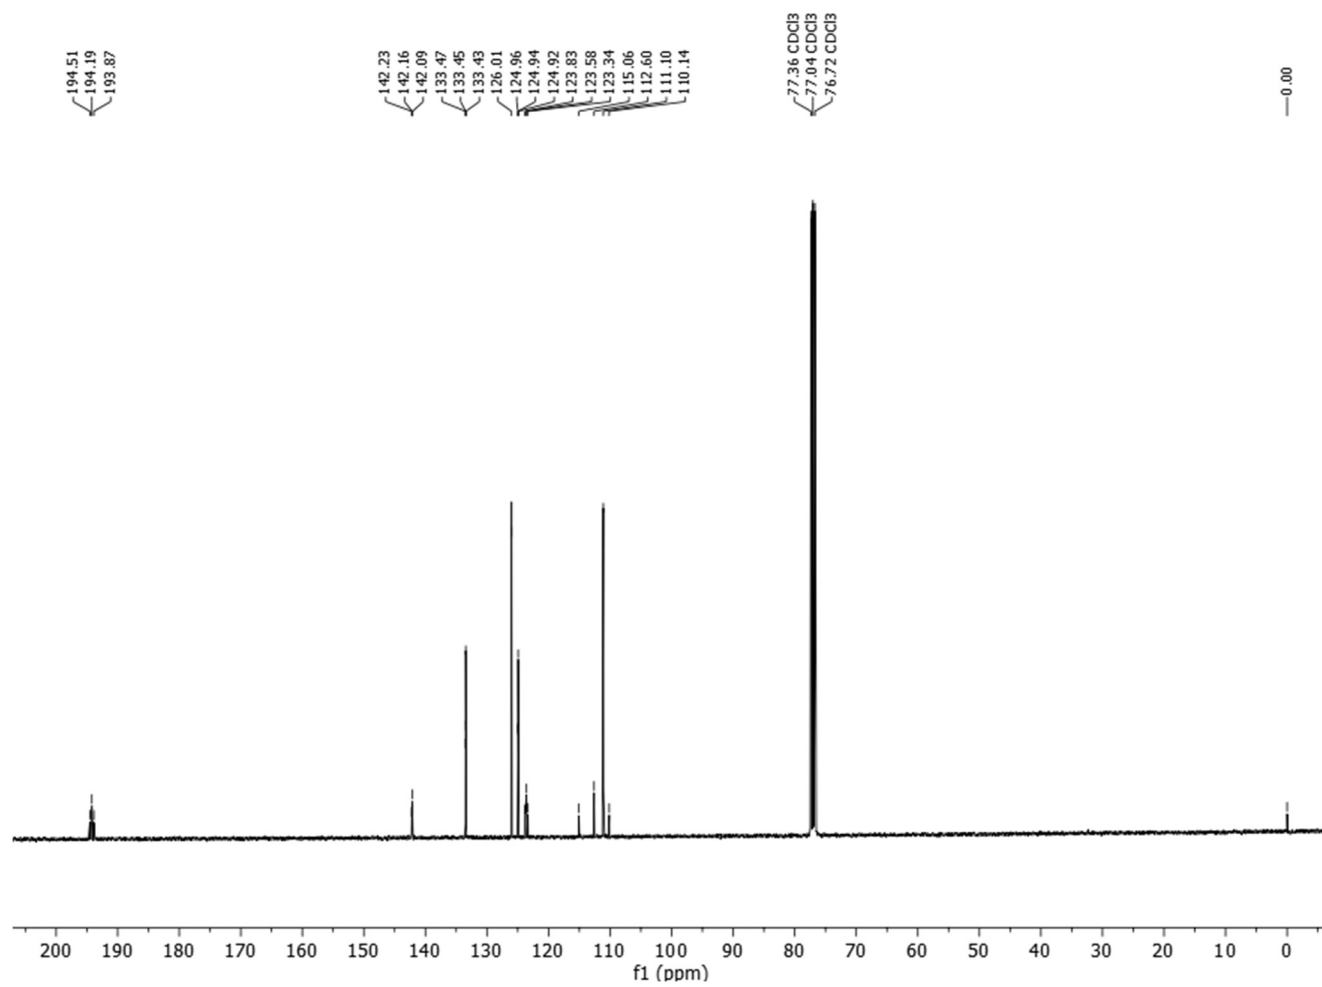

$^{13}\text{C}$  NMR (75 MHz,  $\text{CDCl}_3$ )

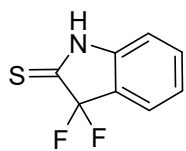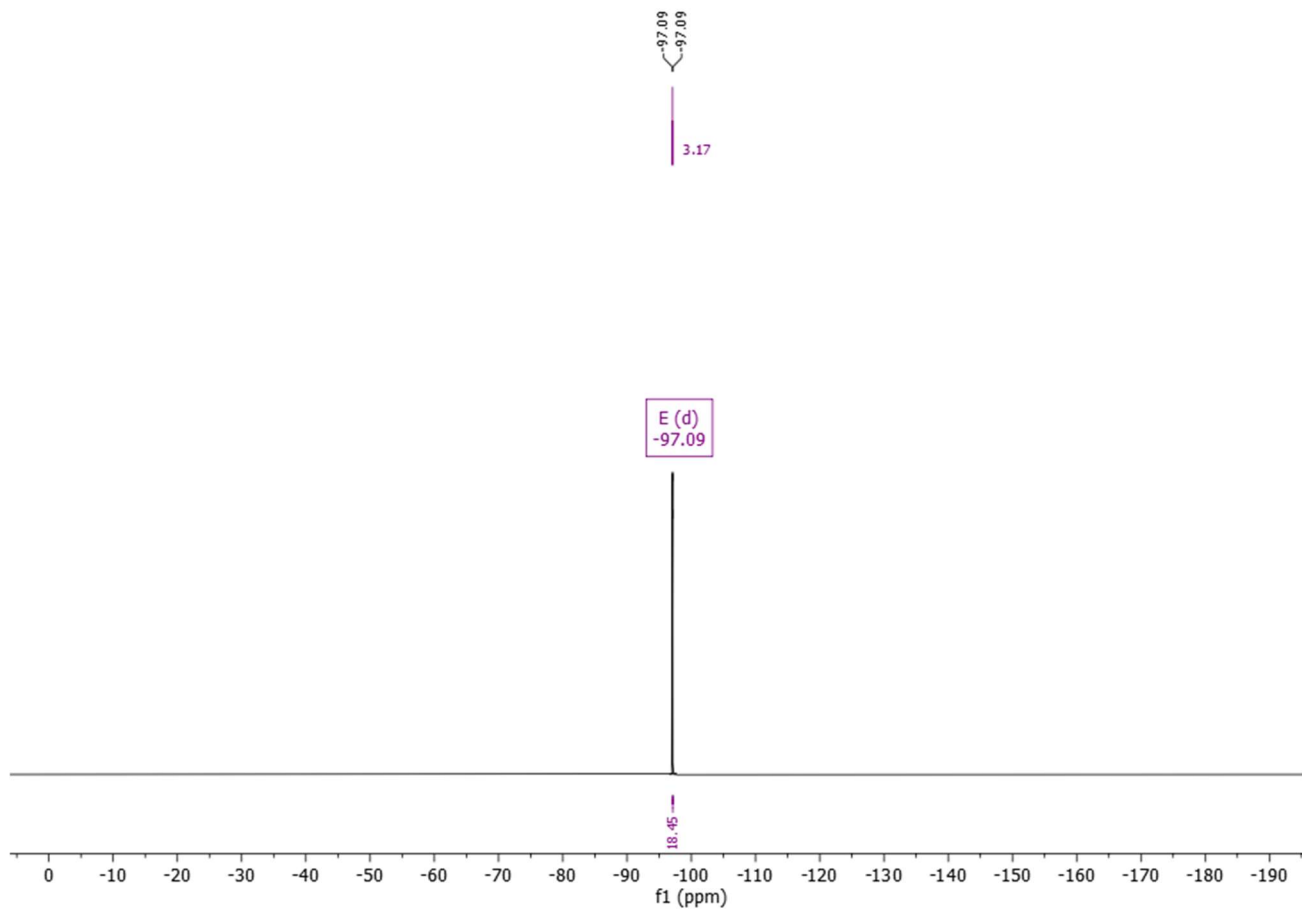

$^{19}\text{F}$  NMR (376 MHz,  $\text{CDCl}_3$ )

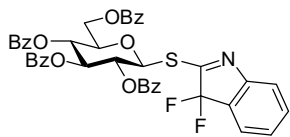

2

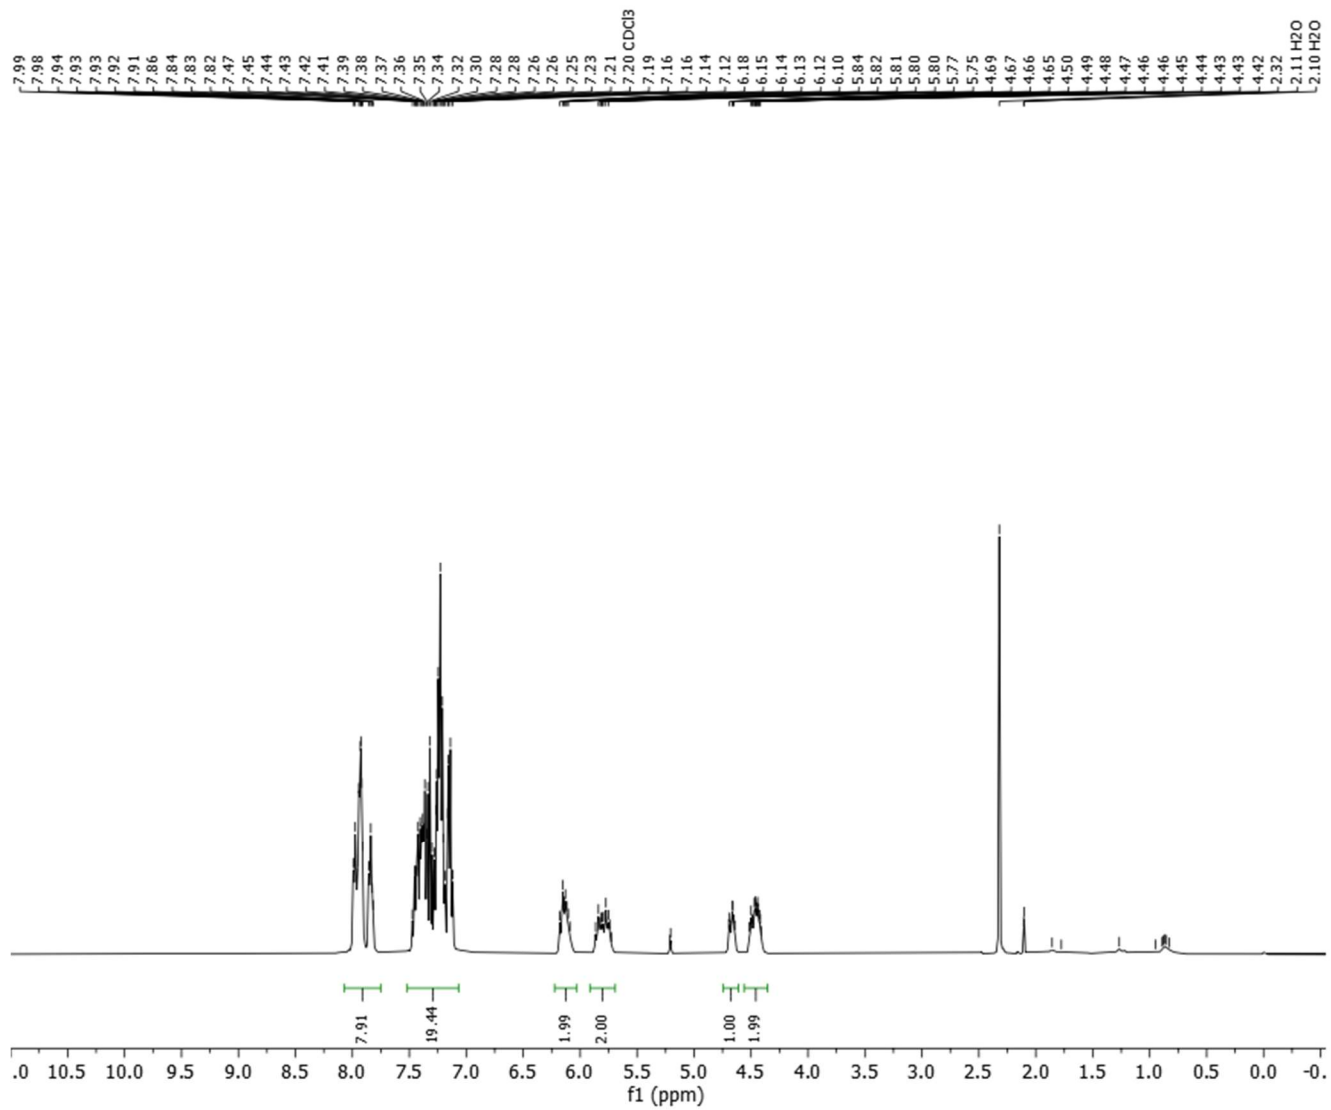

<sup>1</sup>H NMR (300 MHz, CDCl<sub>3</sub>)

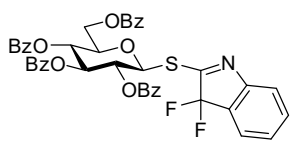

2

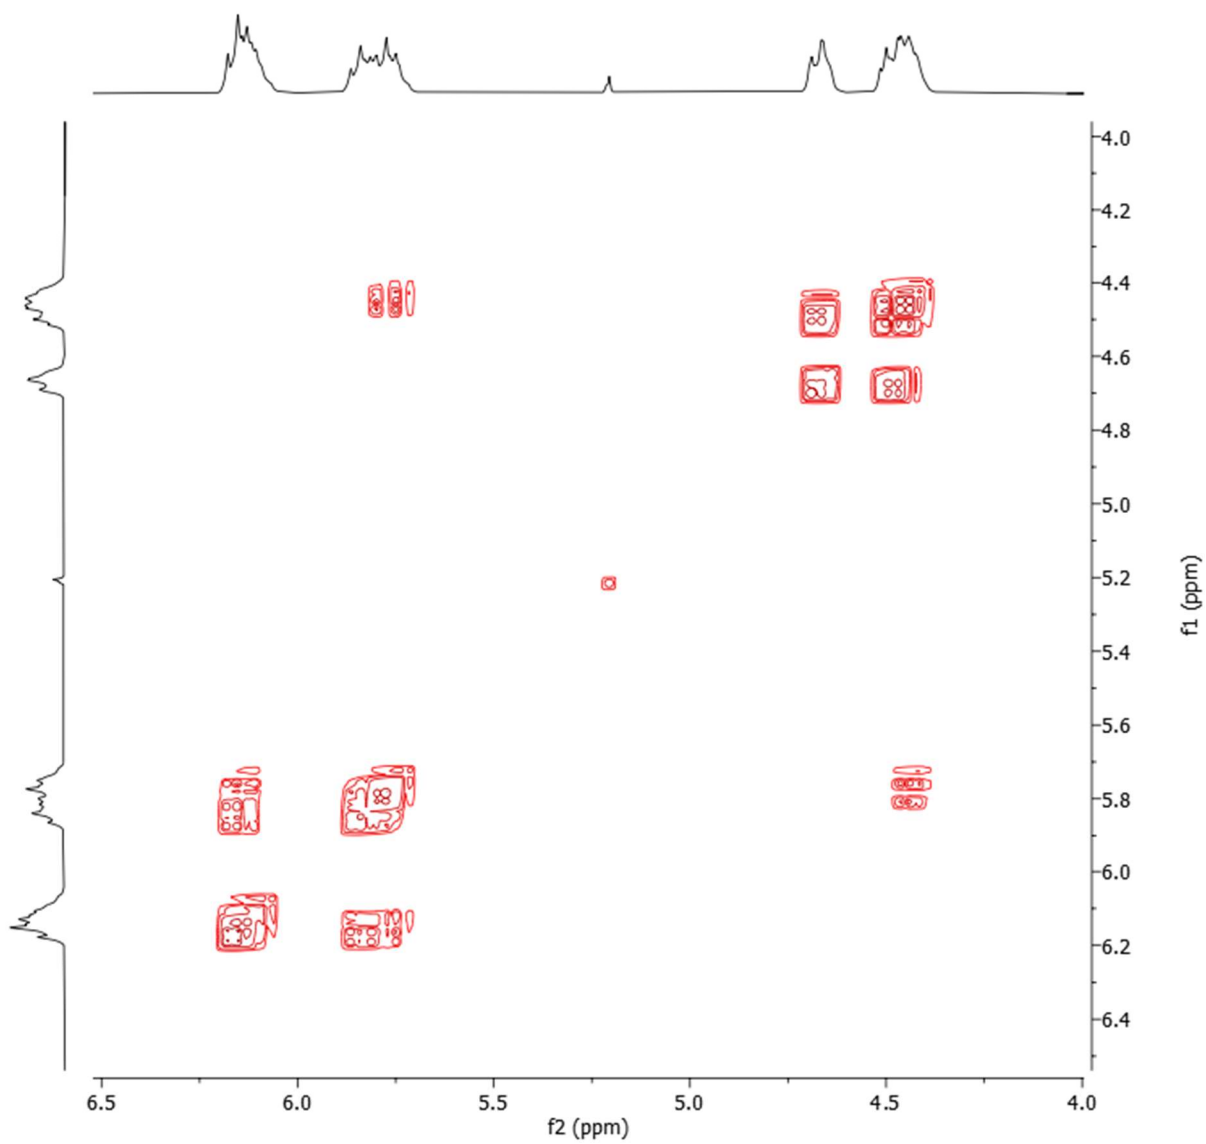

COSY (300 MHz, CDCl<sub>3</sub>)

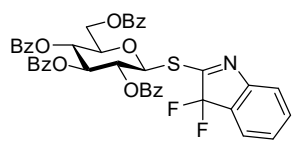

2

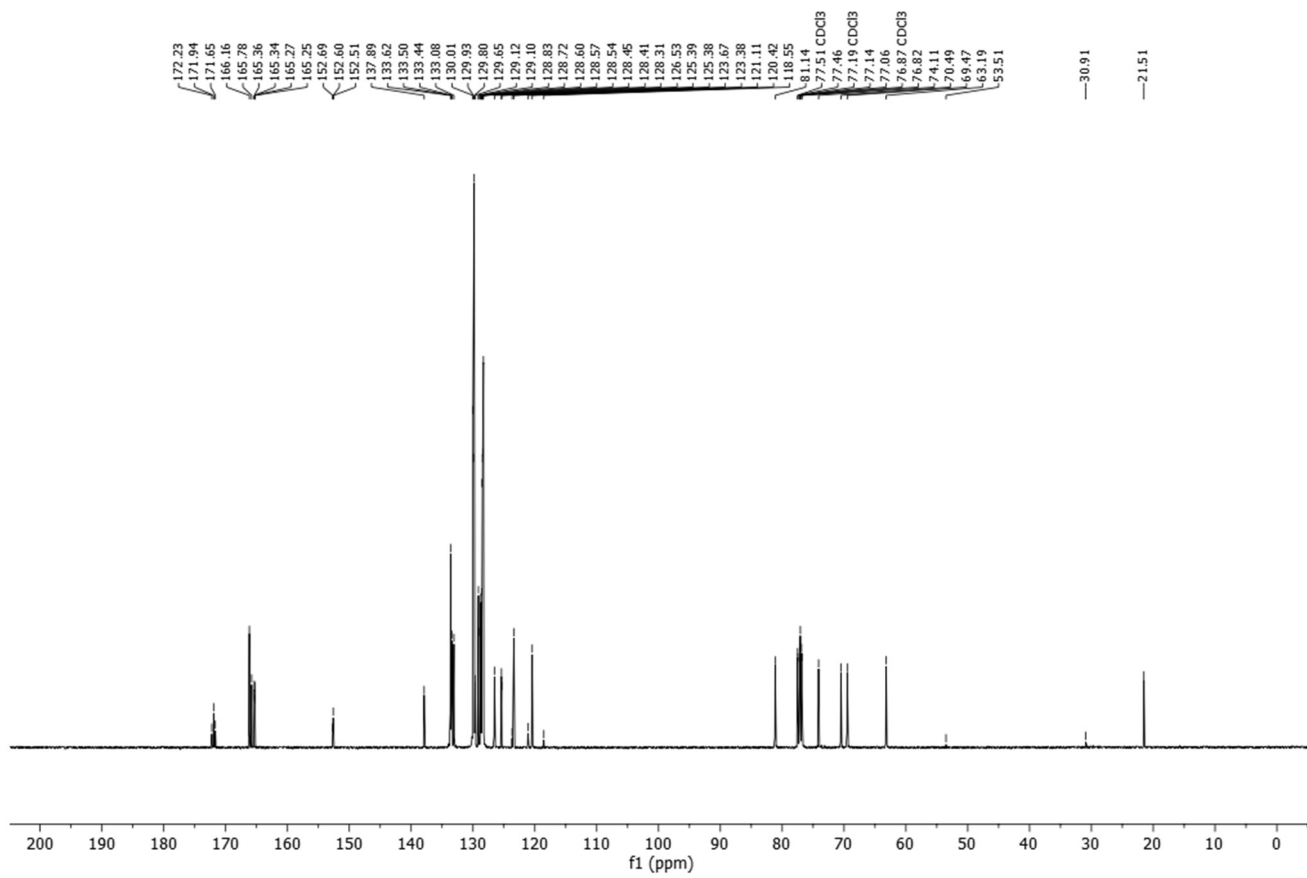

$^{13}\text{C}$  NMR (101 MHz,  $\text{CDCl}_3$ )

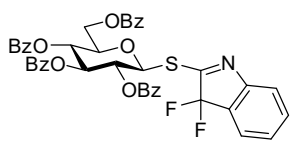

2

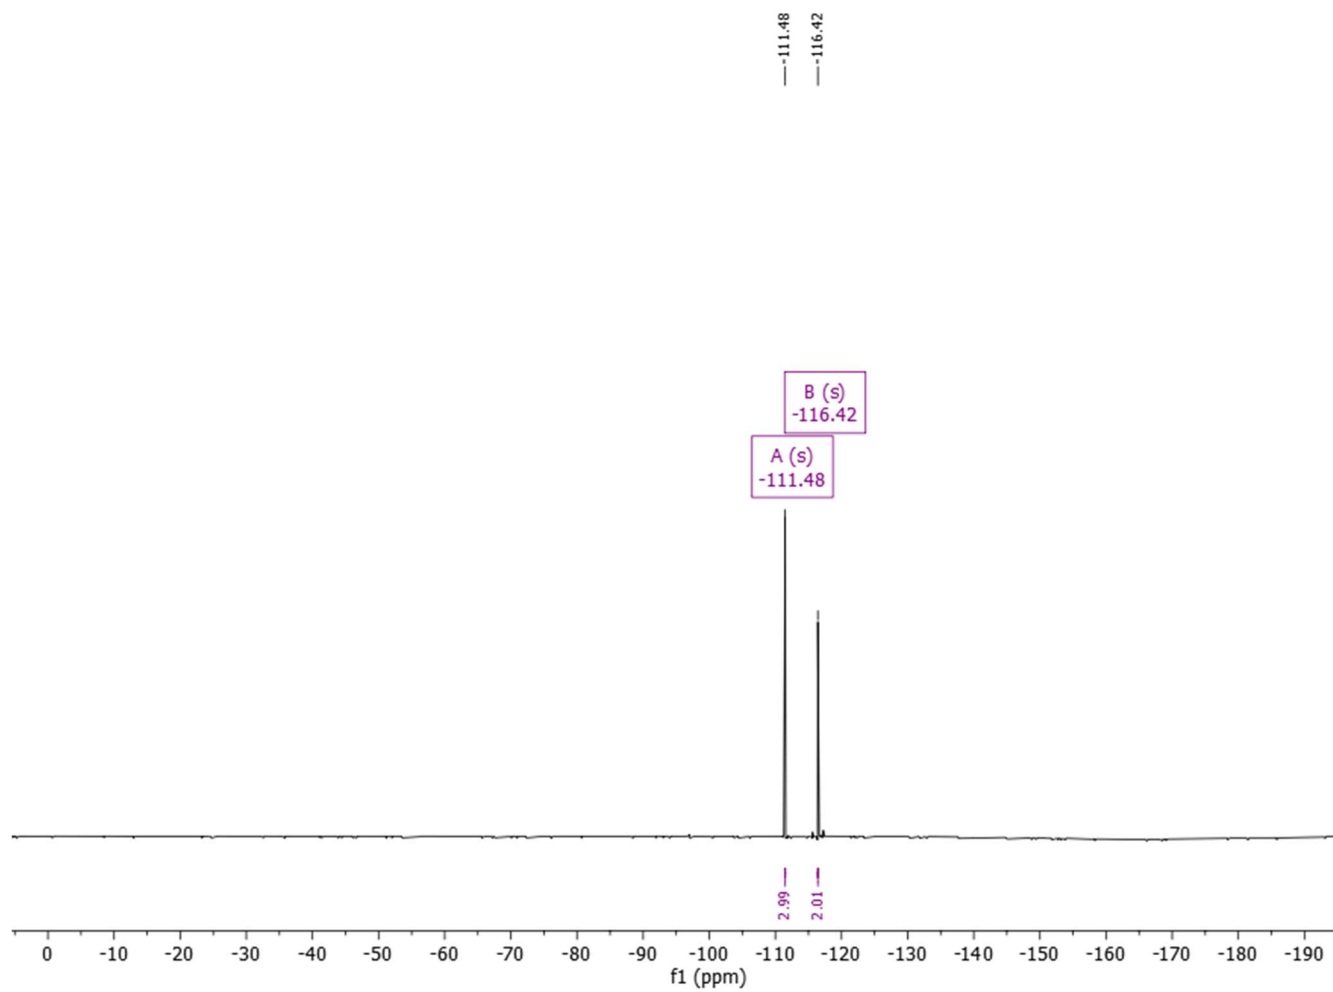

$^{19}\text{F}$  NMR (376 MHz,  $\text{CDCl}_3$ )



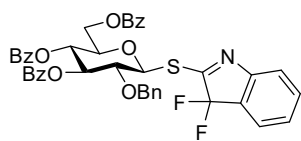

4

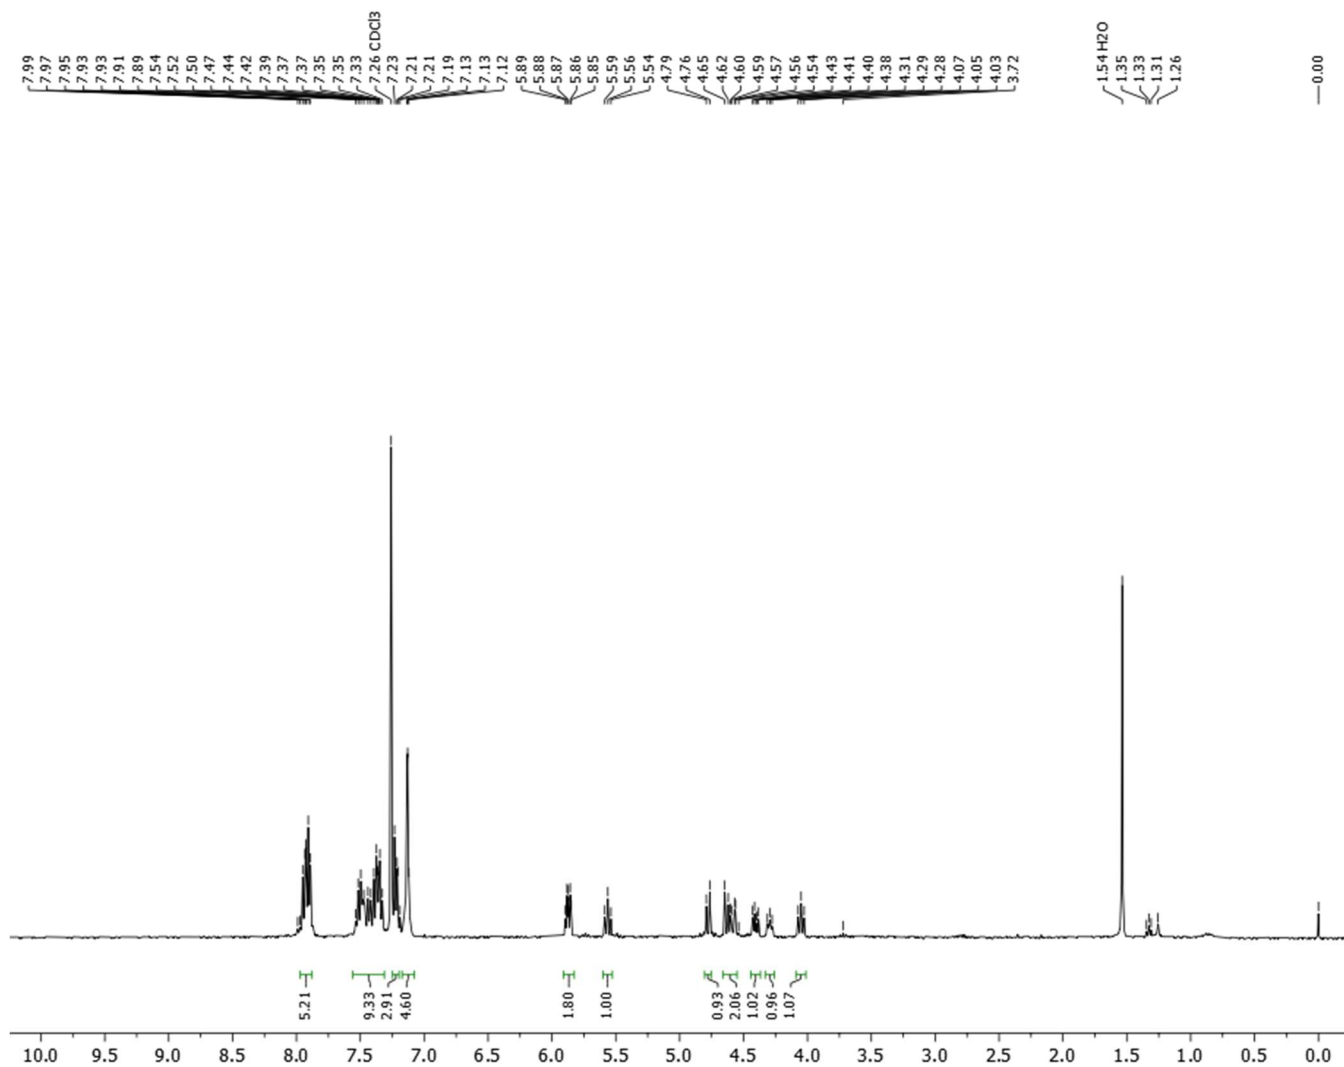

<sup>1</sup>H NMR (400 MHz, CDCl<sub>3</sub>)

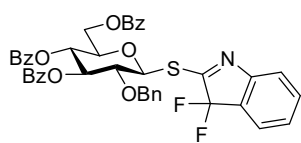

4

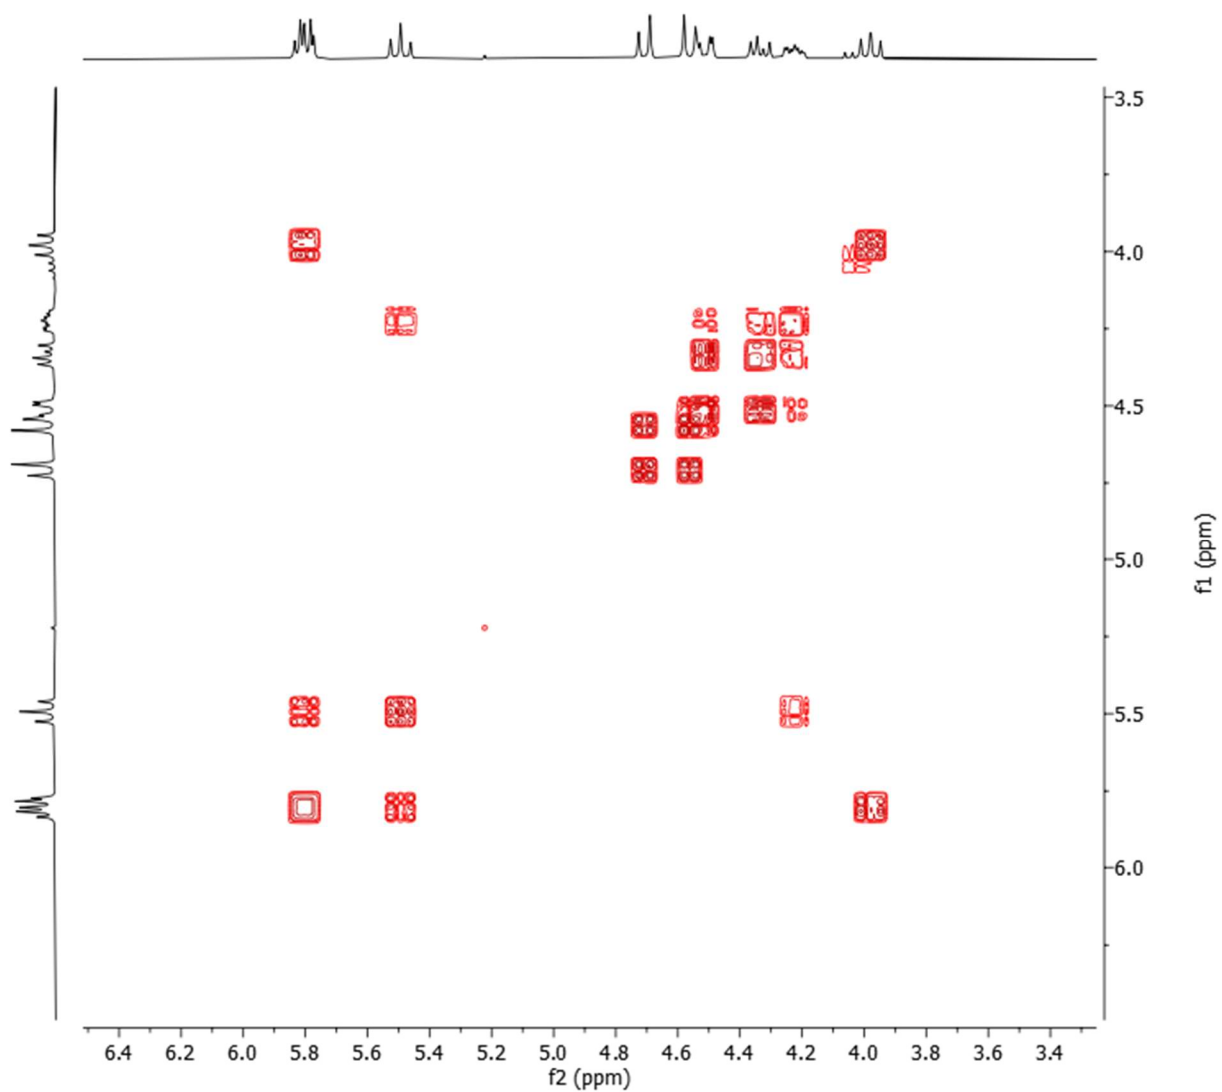

COSY (300 MHz, CDCl<sub>3</sub>)

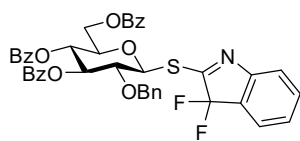

4

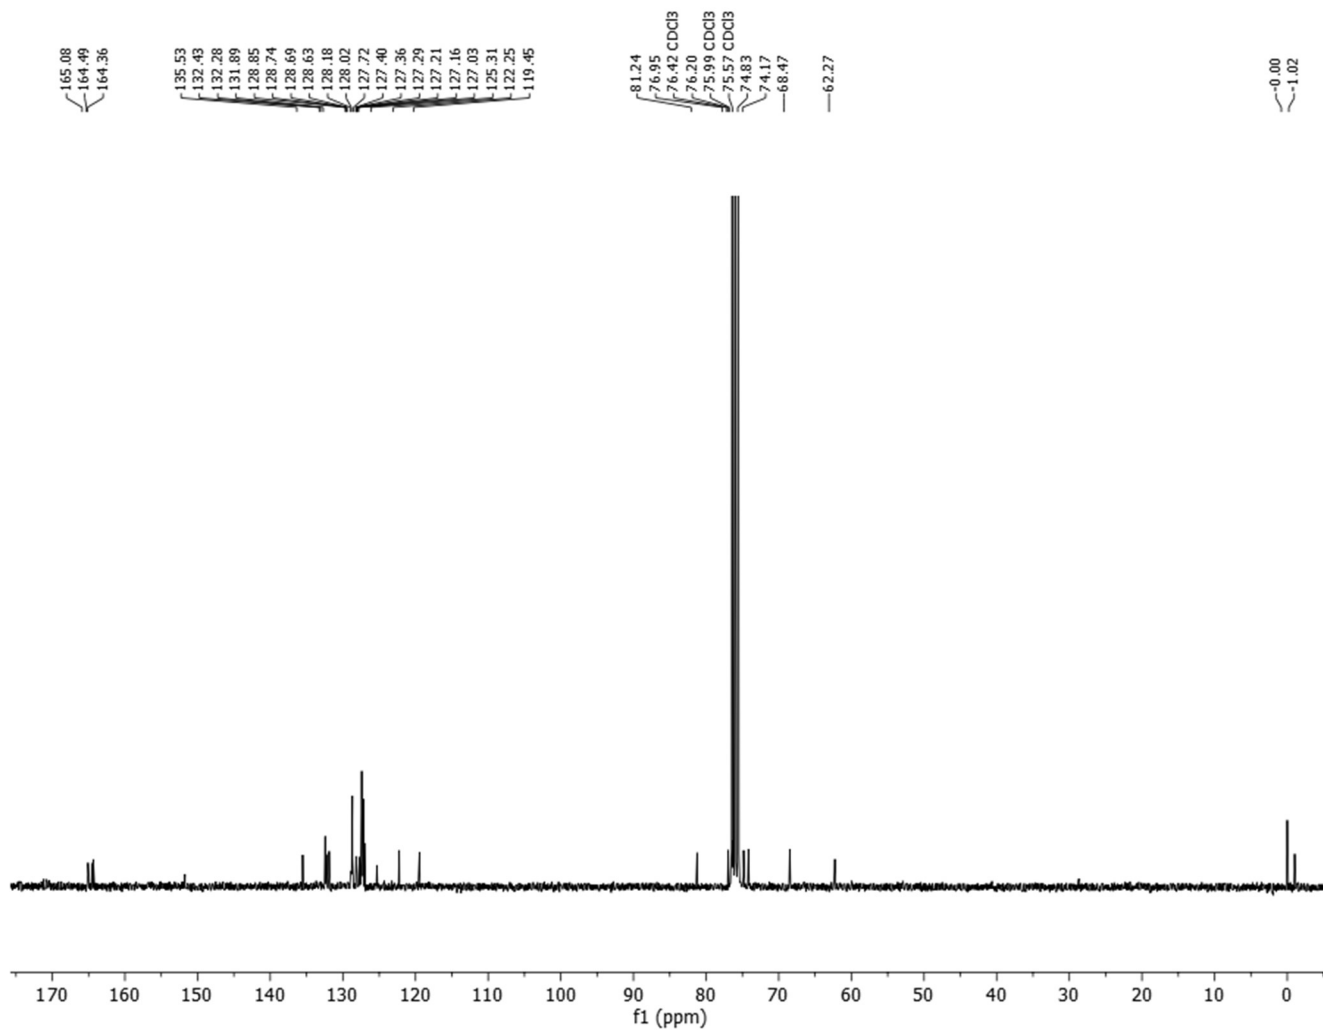

$^{13}\text{C}$  NMR (75 MHz,  $\text{CDCl}_3$ )



4

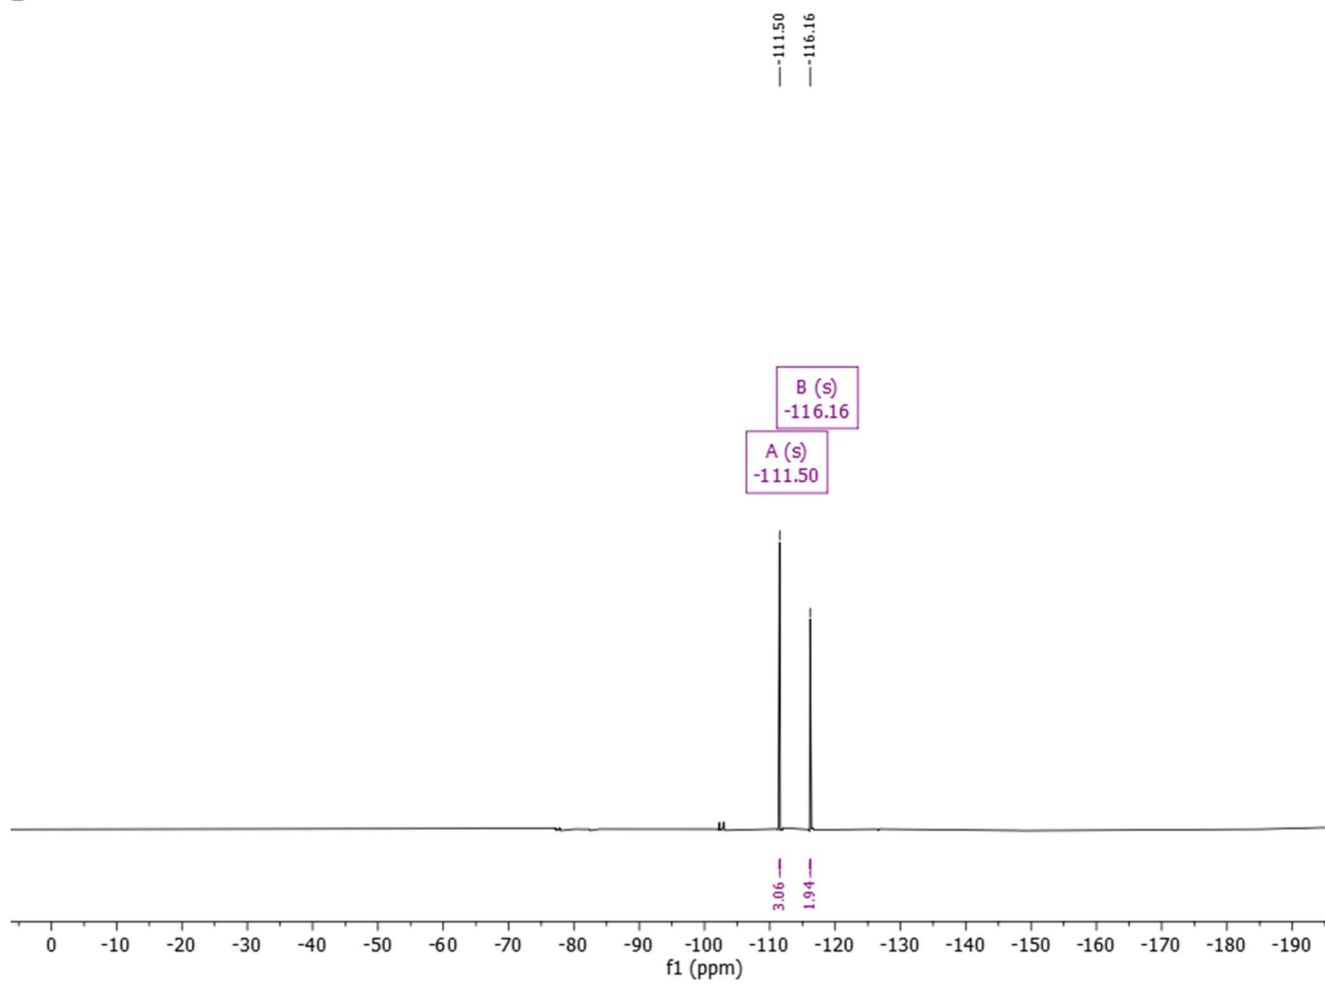

<sup>19</sup>F NMR (376 MHz, CDCl<sub>3</sub>)

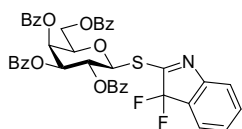

6

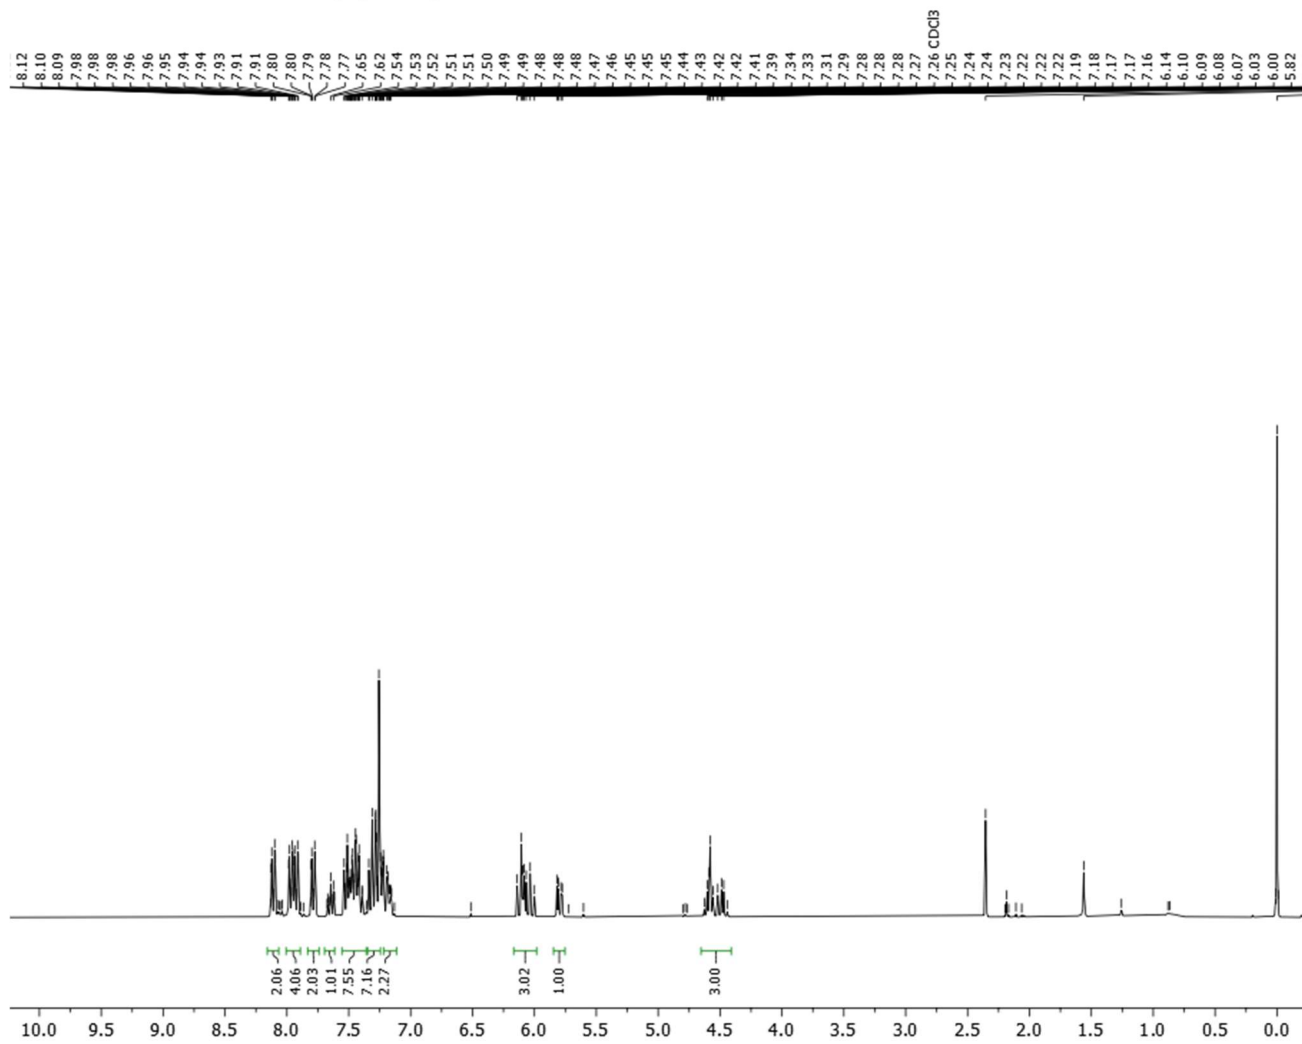

$^1\text{H}$  NMR (300 MHz,  $\text{CDCl}_3$ )

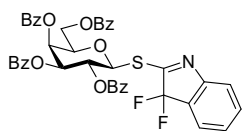

6

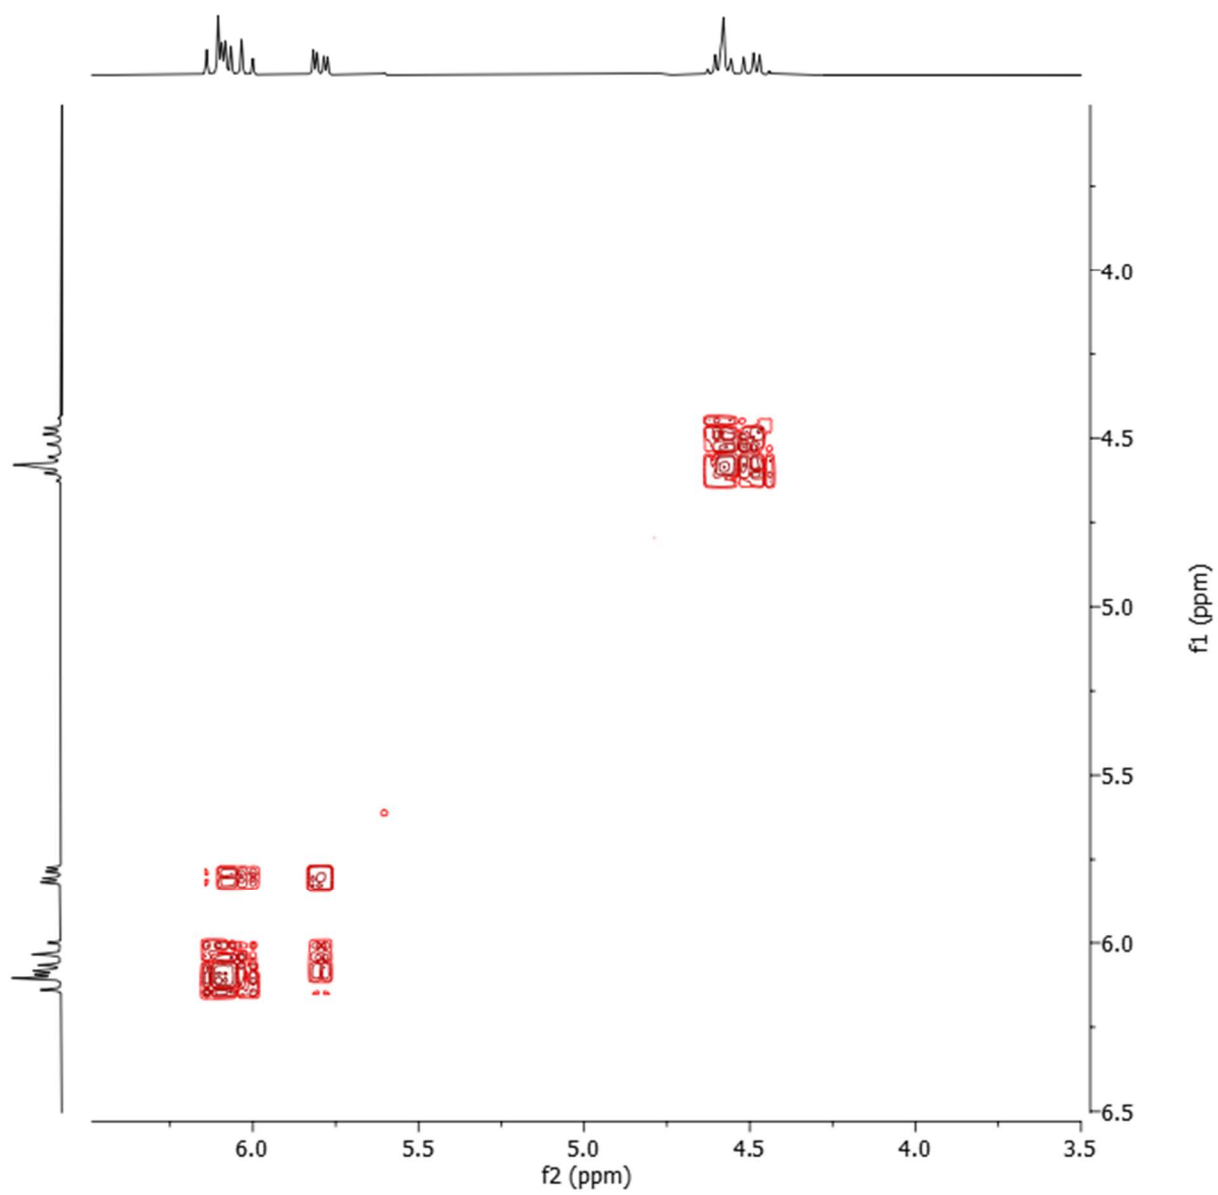

COSY (300 MHz, CDCl<sub>3</sub>)



6

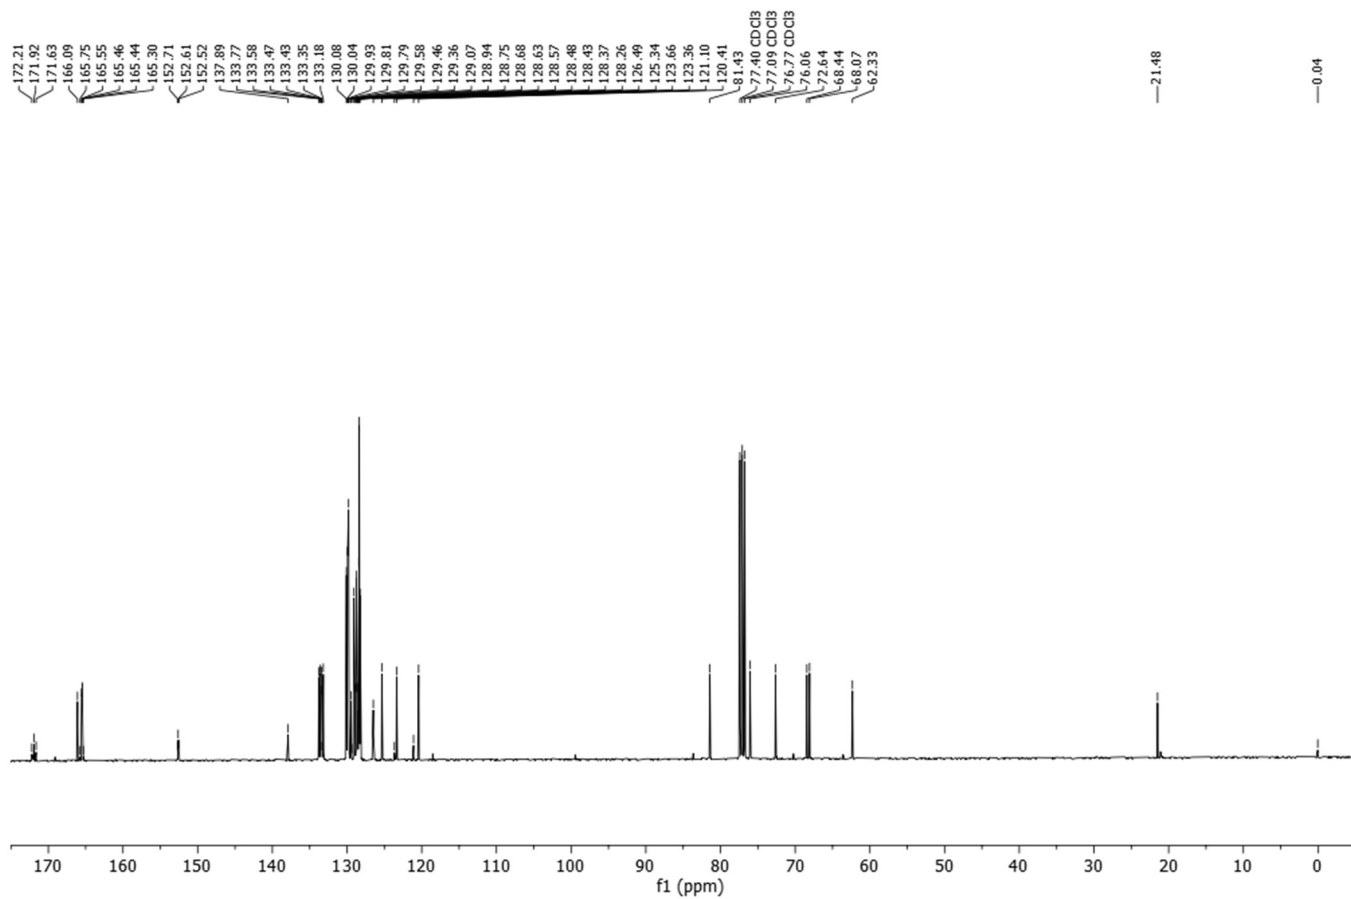

$^{13}\text{C}$  NMR (75 MHz,  $\text{CDCl}_3$ )

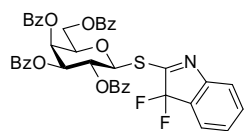

6

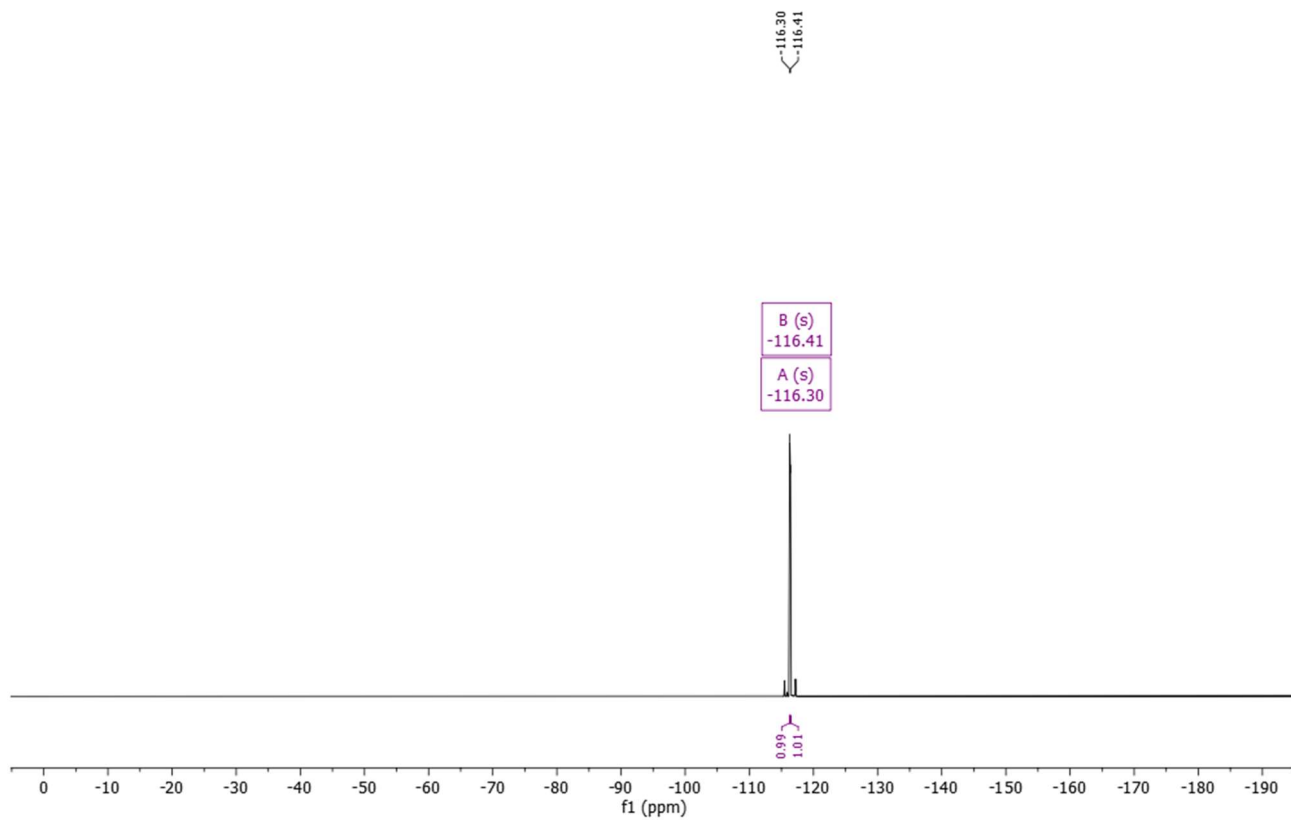

$^{19}\text{F}$  NMR (376 MHz,  $\text{CDCl}_3$ )



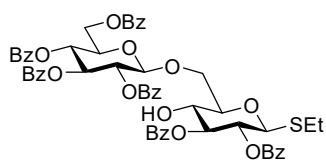

22

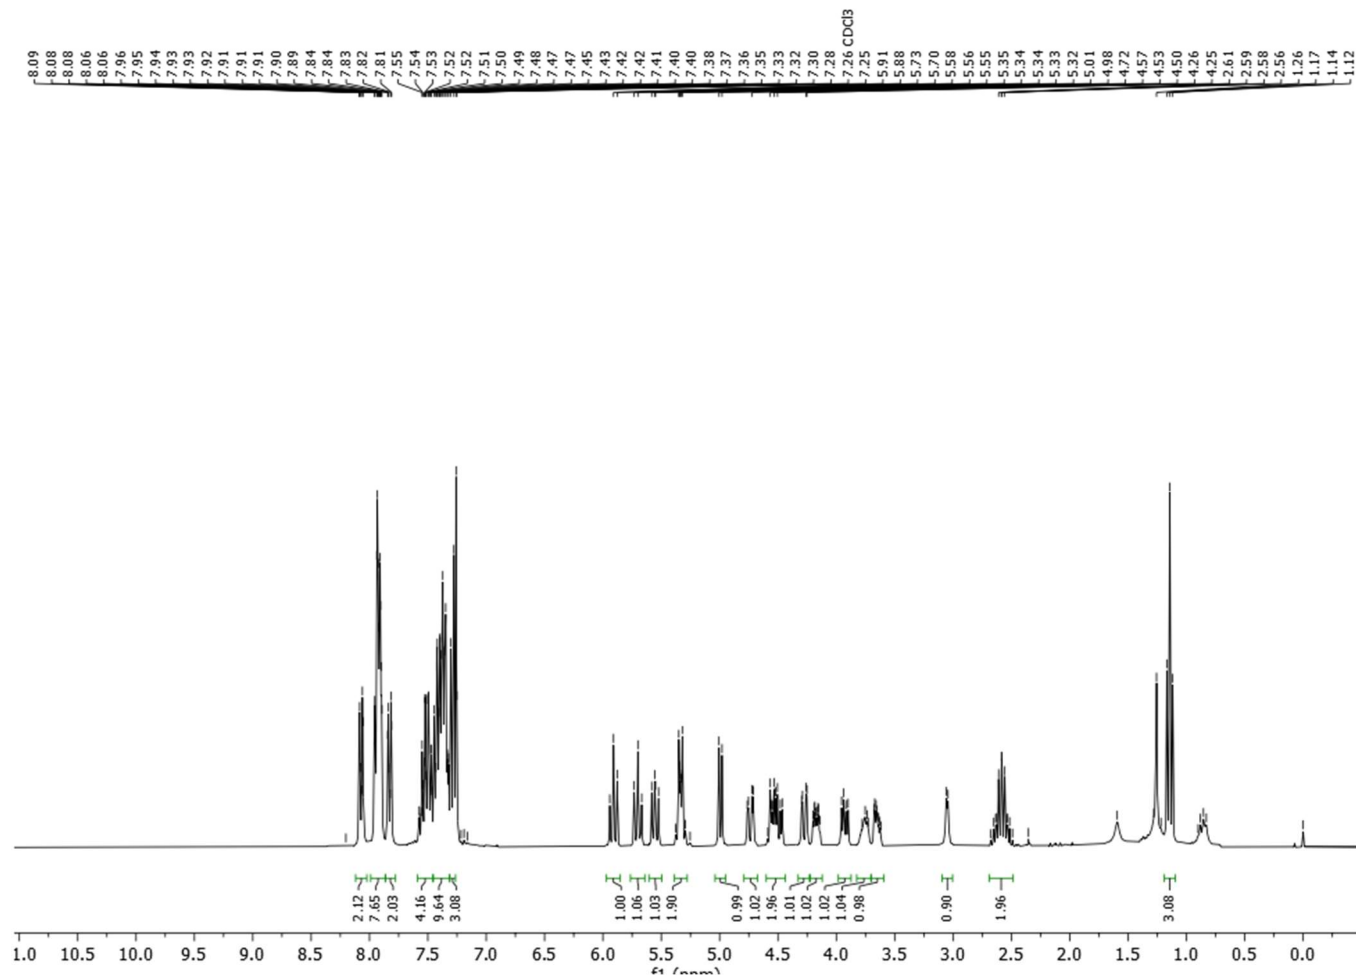

<sup>1</sup>H NMR (300 MHz, CDCl<sub>3</sub>)

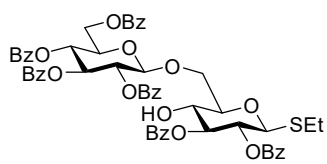

22

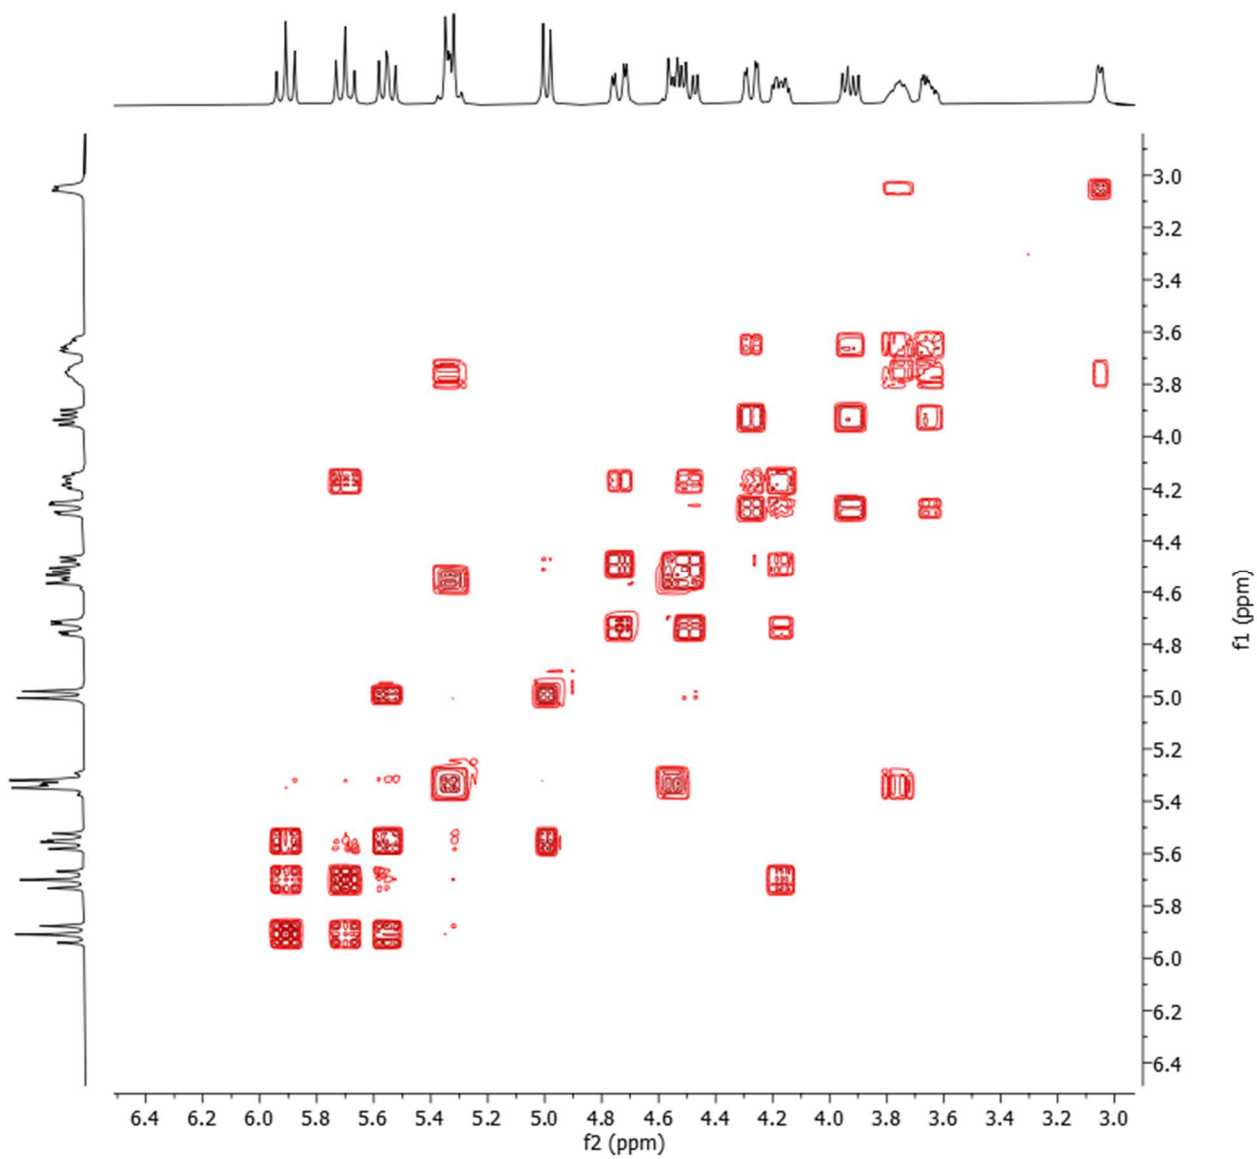

COSY (300 MHz,  $\text{CDCl}_3$ )



22

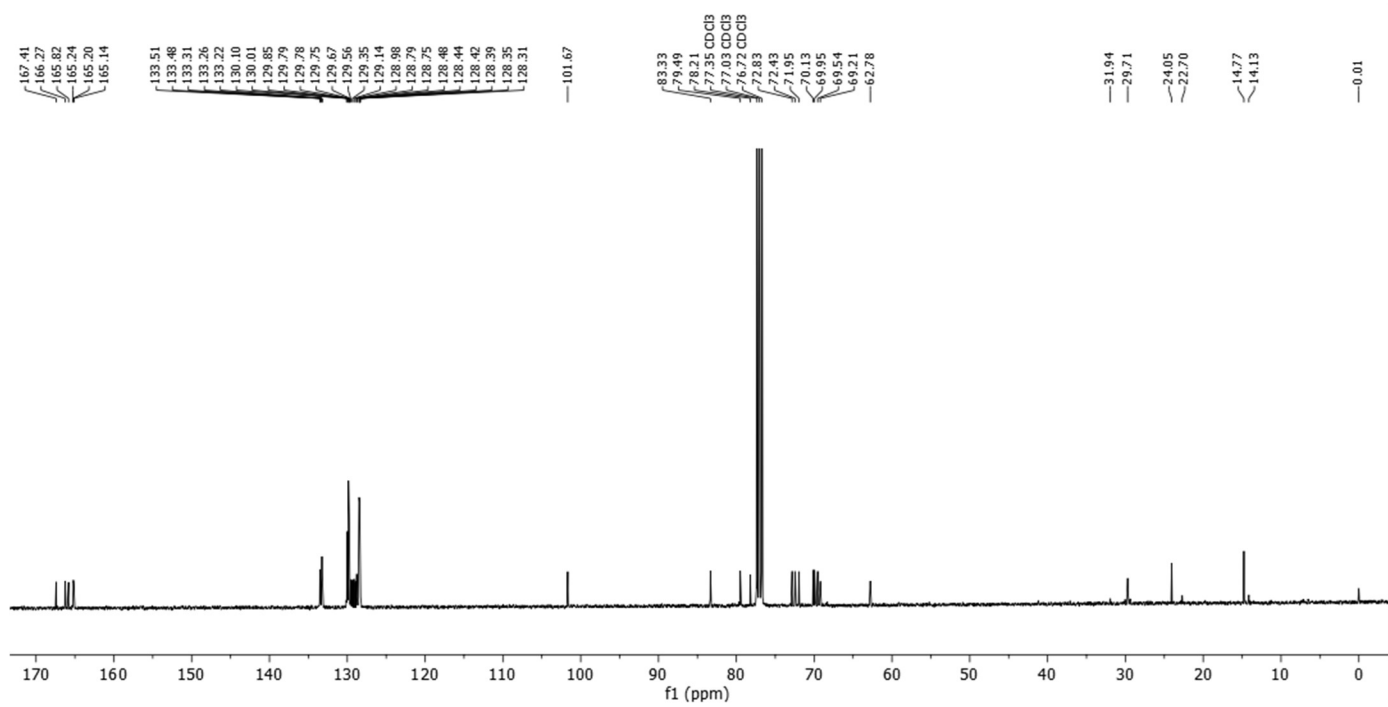

$^{13}\text{C}$  NMR (75 MHz,  $\text{CDCl}_3$ )



22

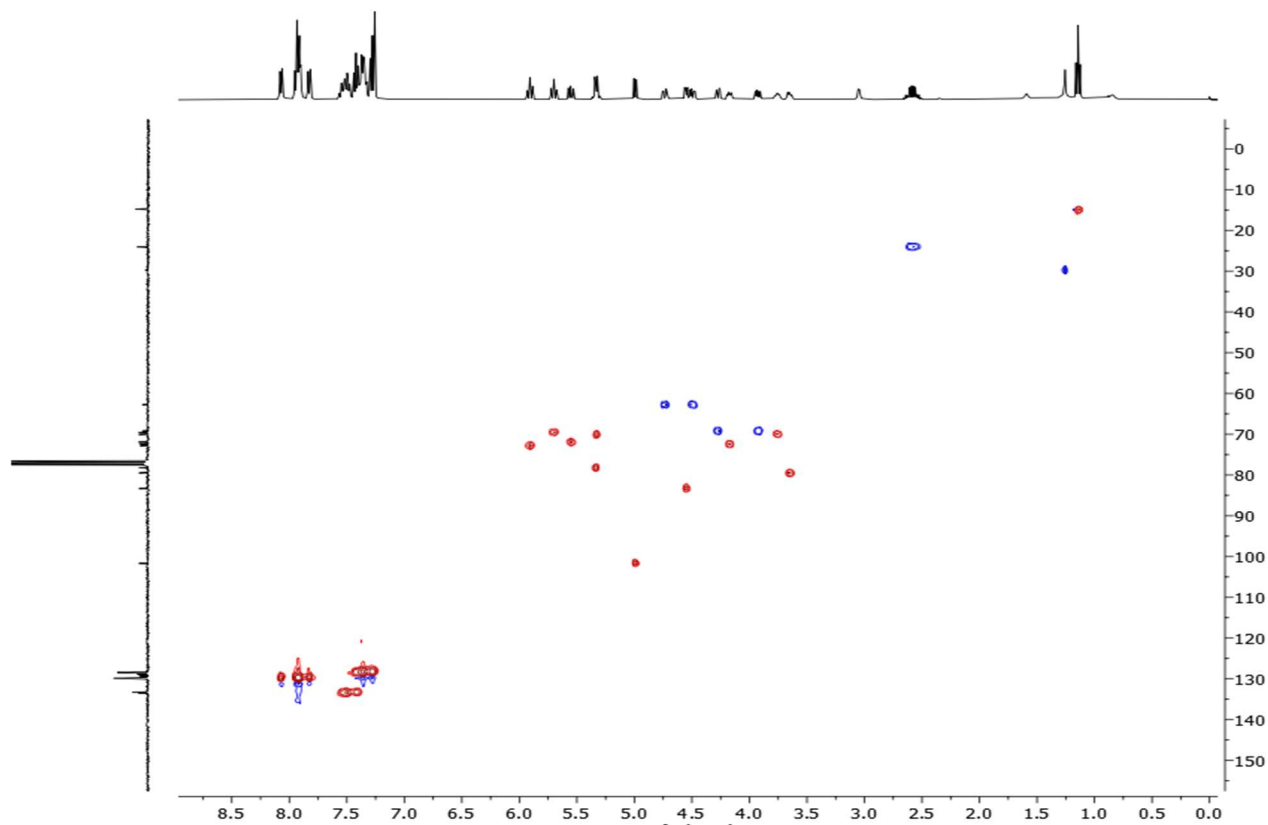

HSQC (300 MHz, CDCl<sub>3</sub>)

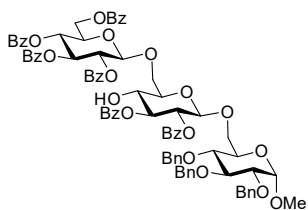

23

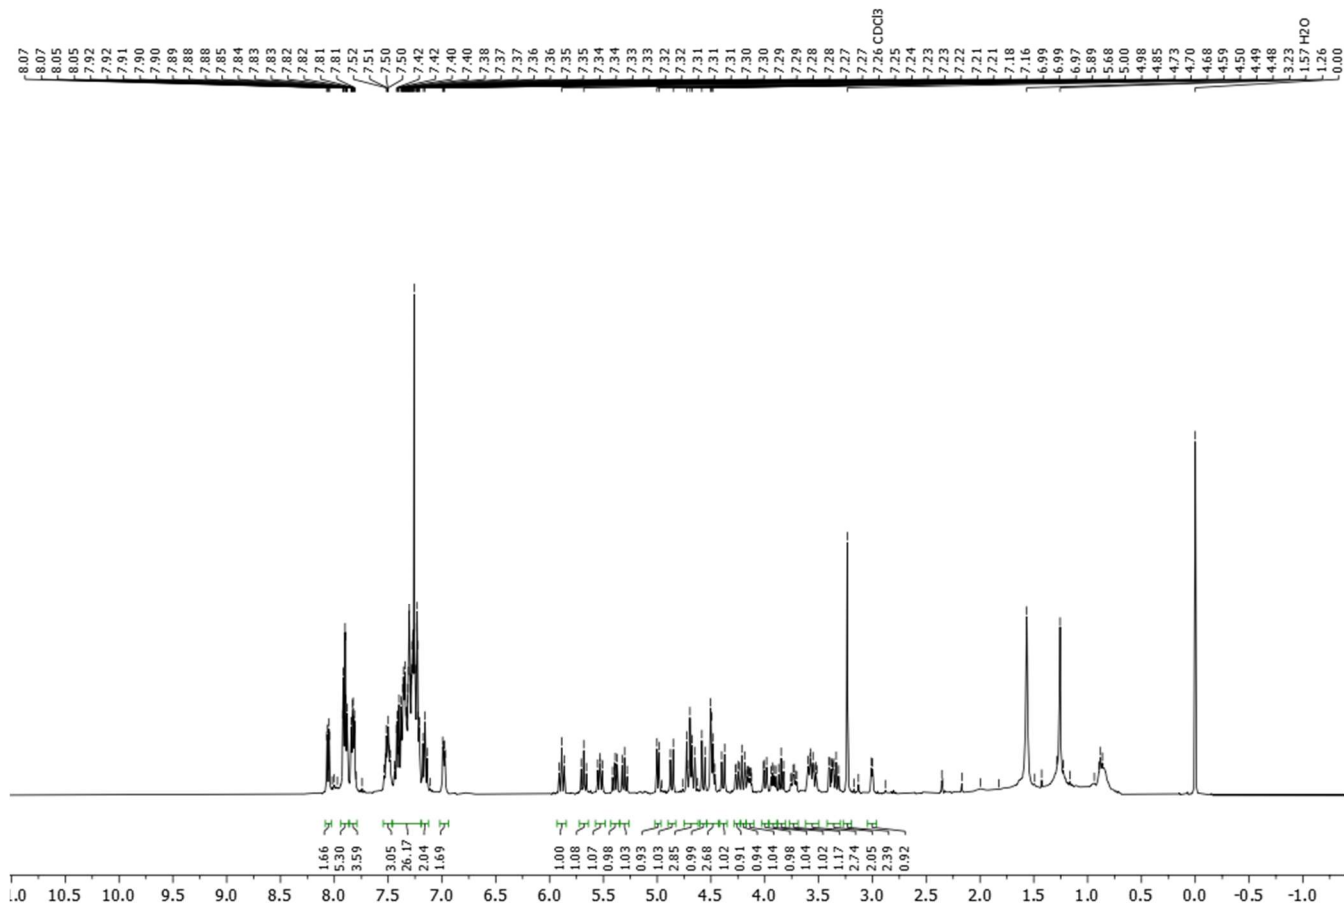

$^1\text{H}$  NMR (400 MHz,  $\text{CDCl}_3$ )

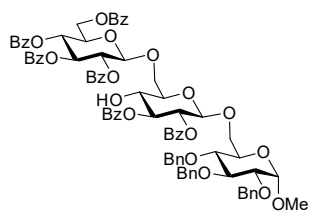

23

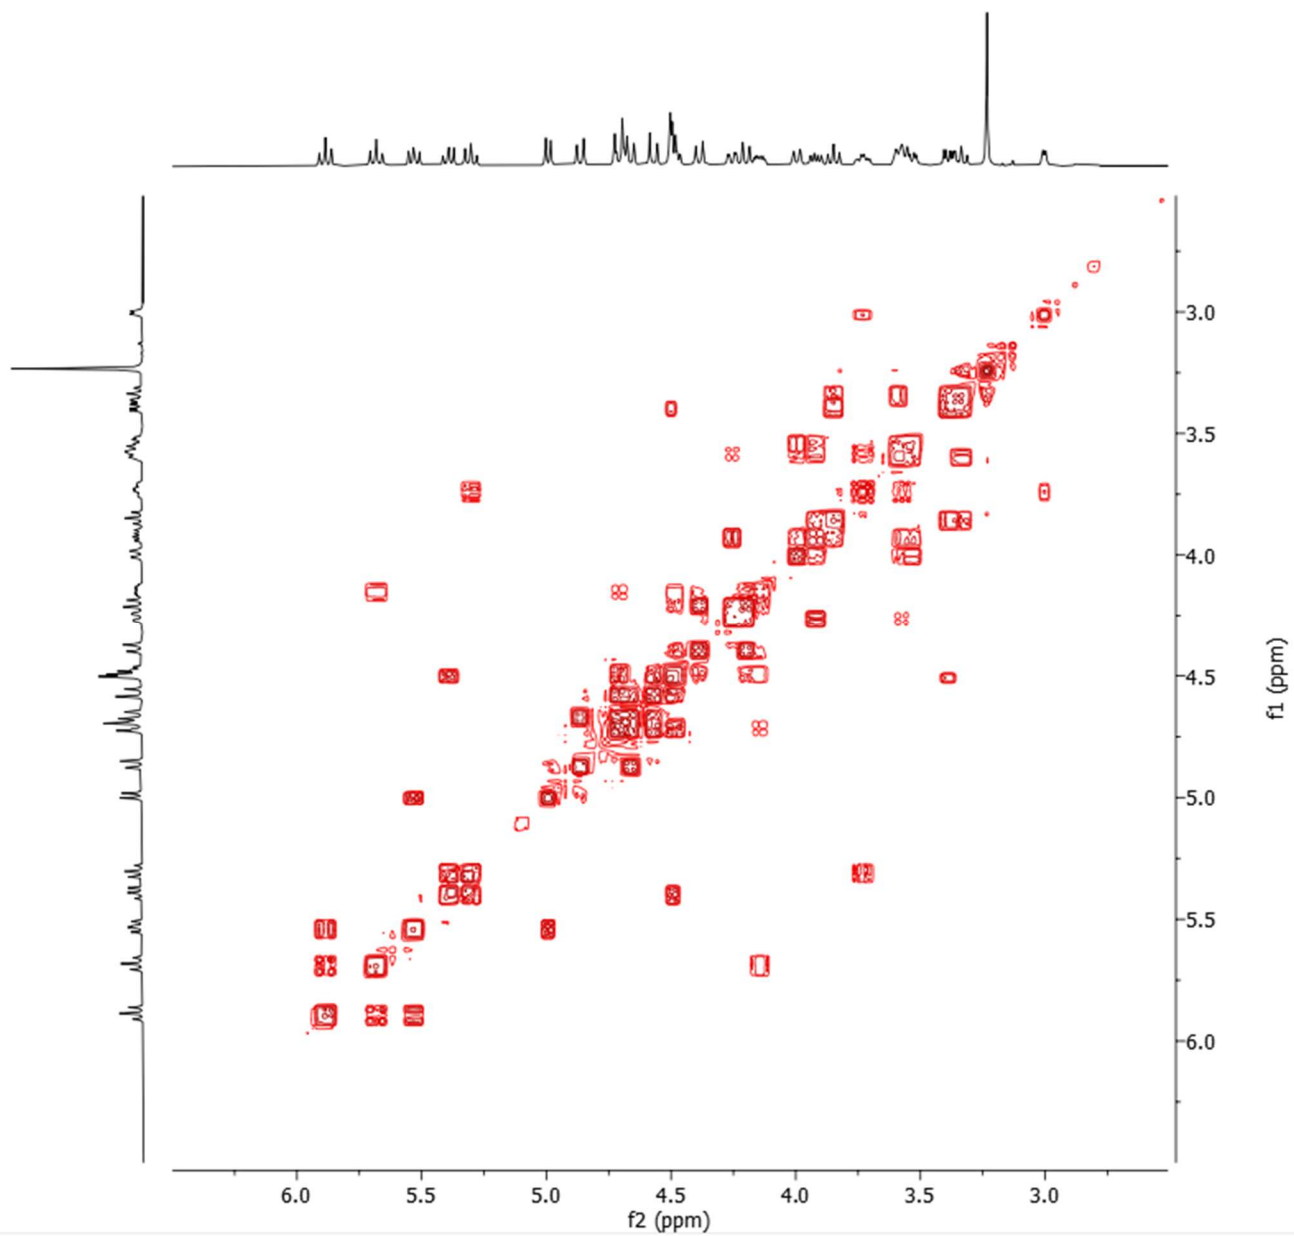

COSY (400 MHz, CDCl<sub>3</sub>)

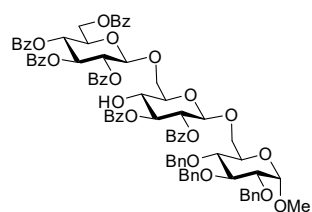

23

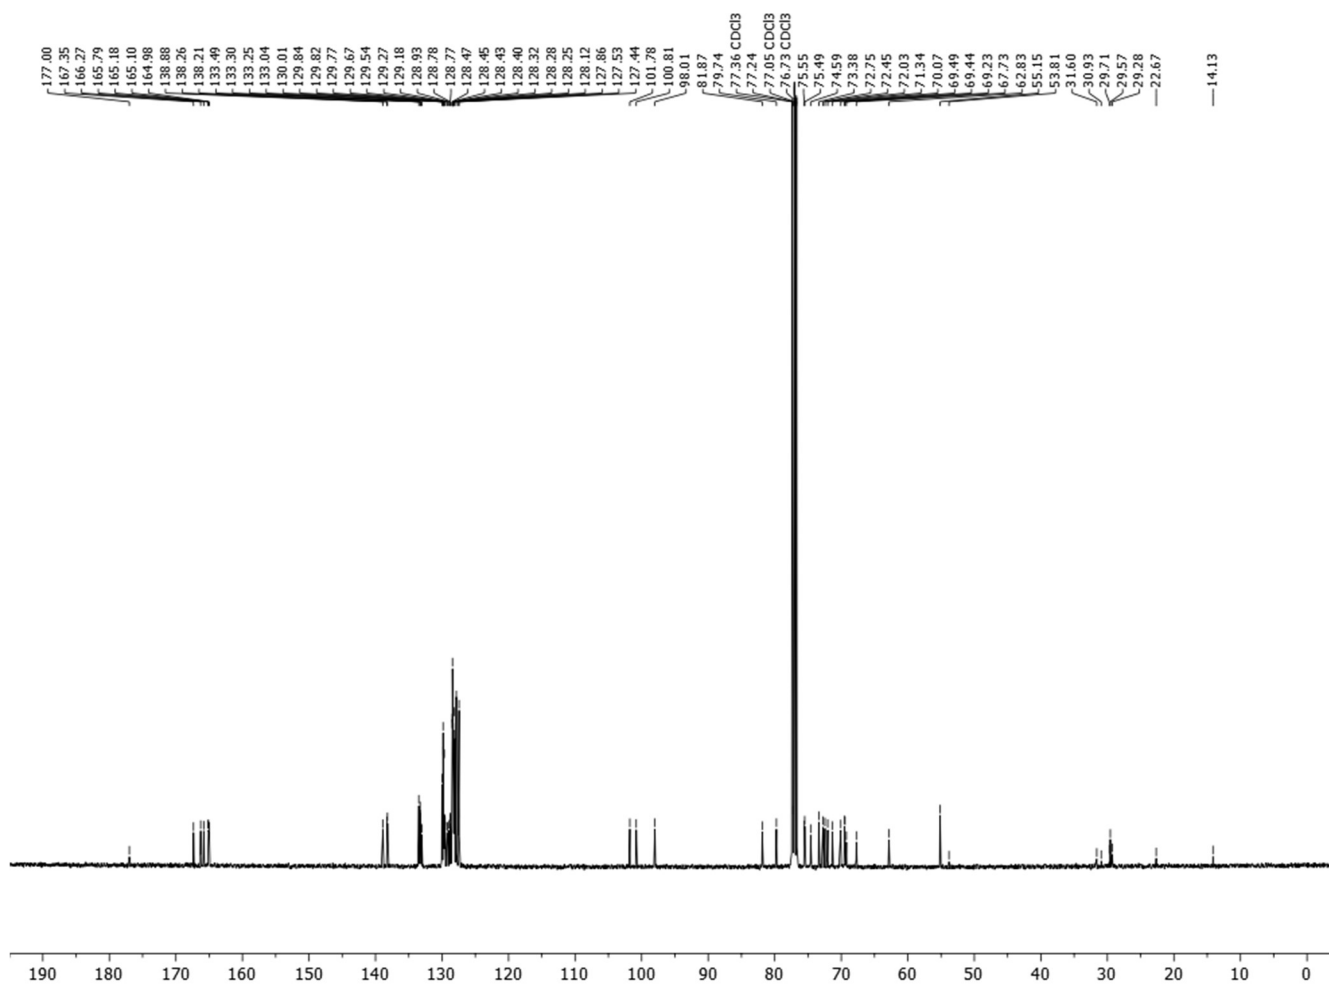

$^{13}\text{C}$  NMR (101 MHz,  $\text{CDCl}_3$ )



23

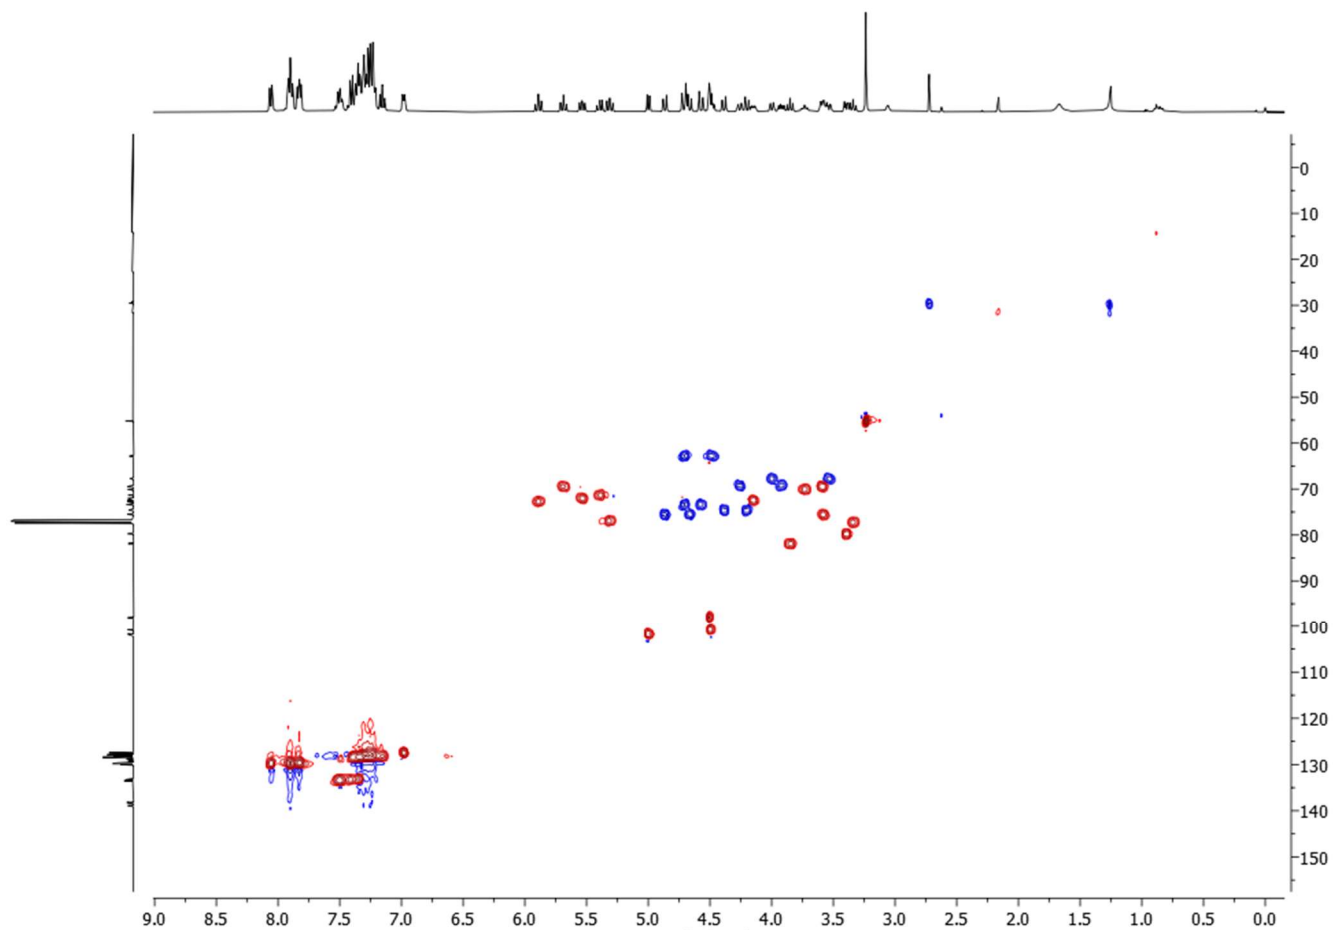

HSQC (400 MHz, CDCl<sub>3</sub>)



# <sup>1</sup>H NMR of known disaccharides

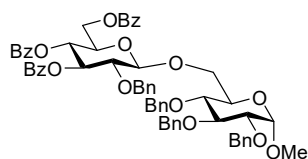

8

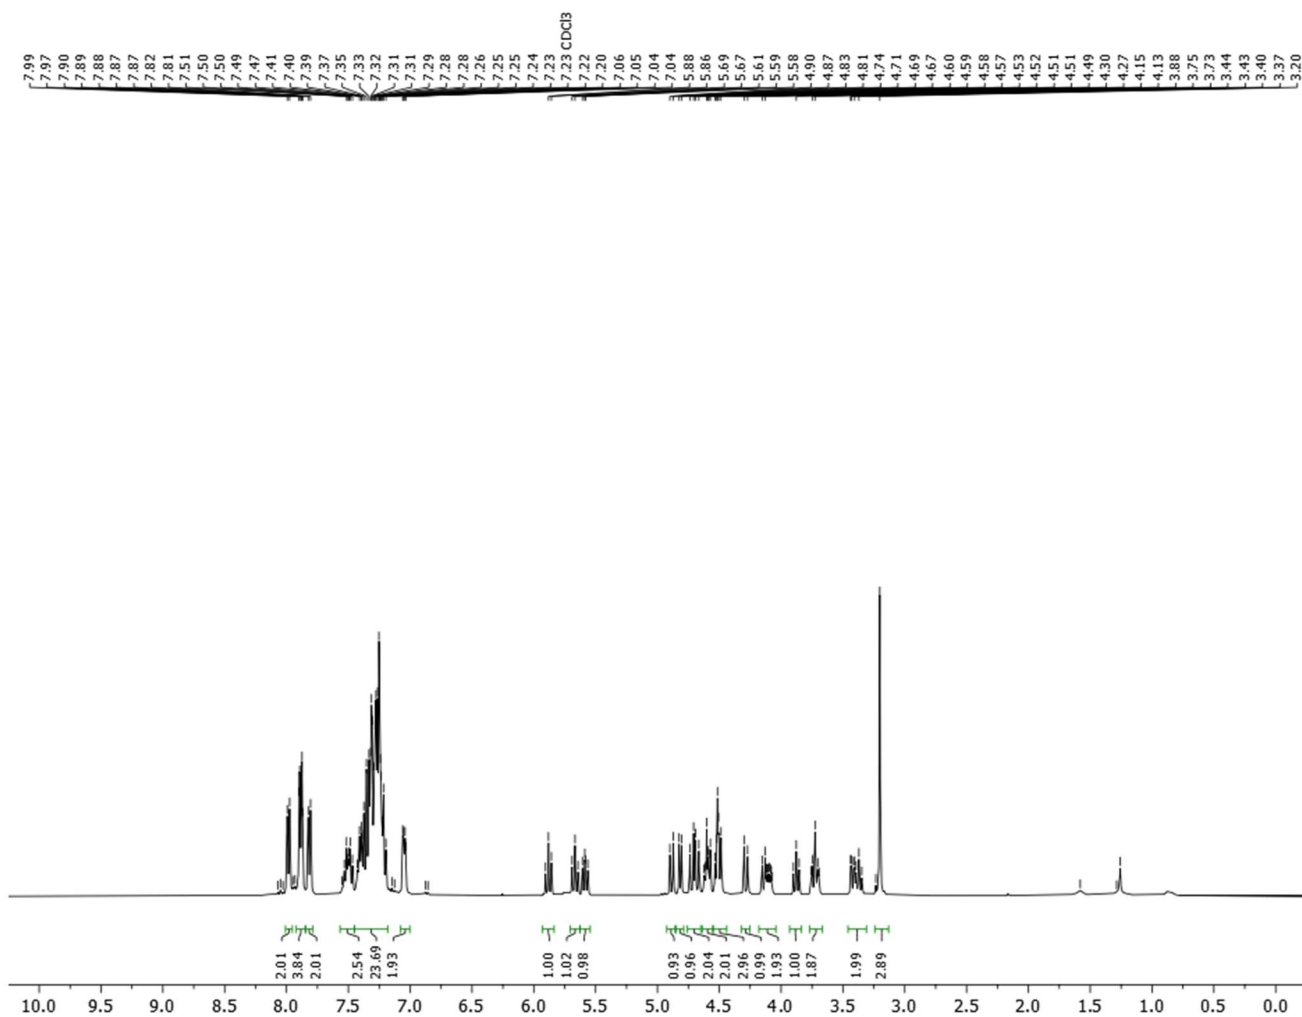

<sup>1</sup>H NMR (400 MHz, CDCl<sub>3</sub>)

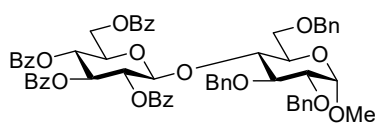

10

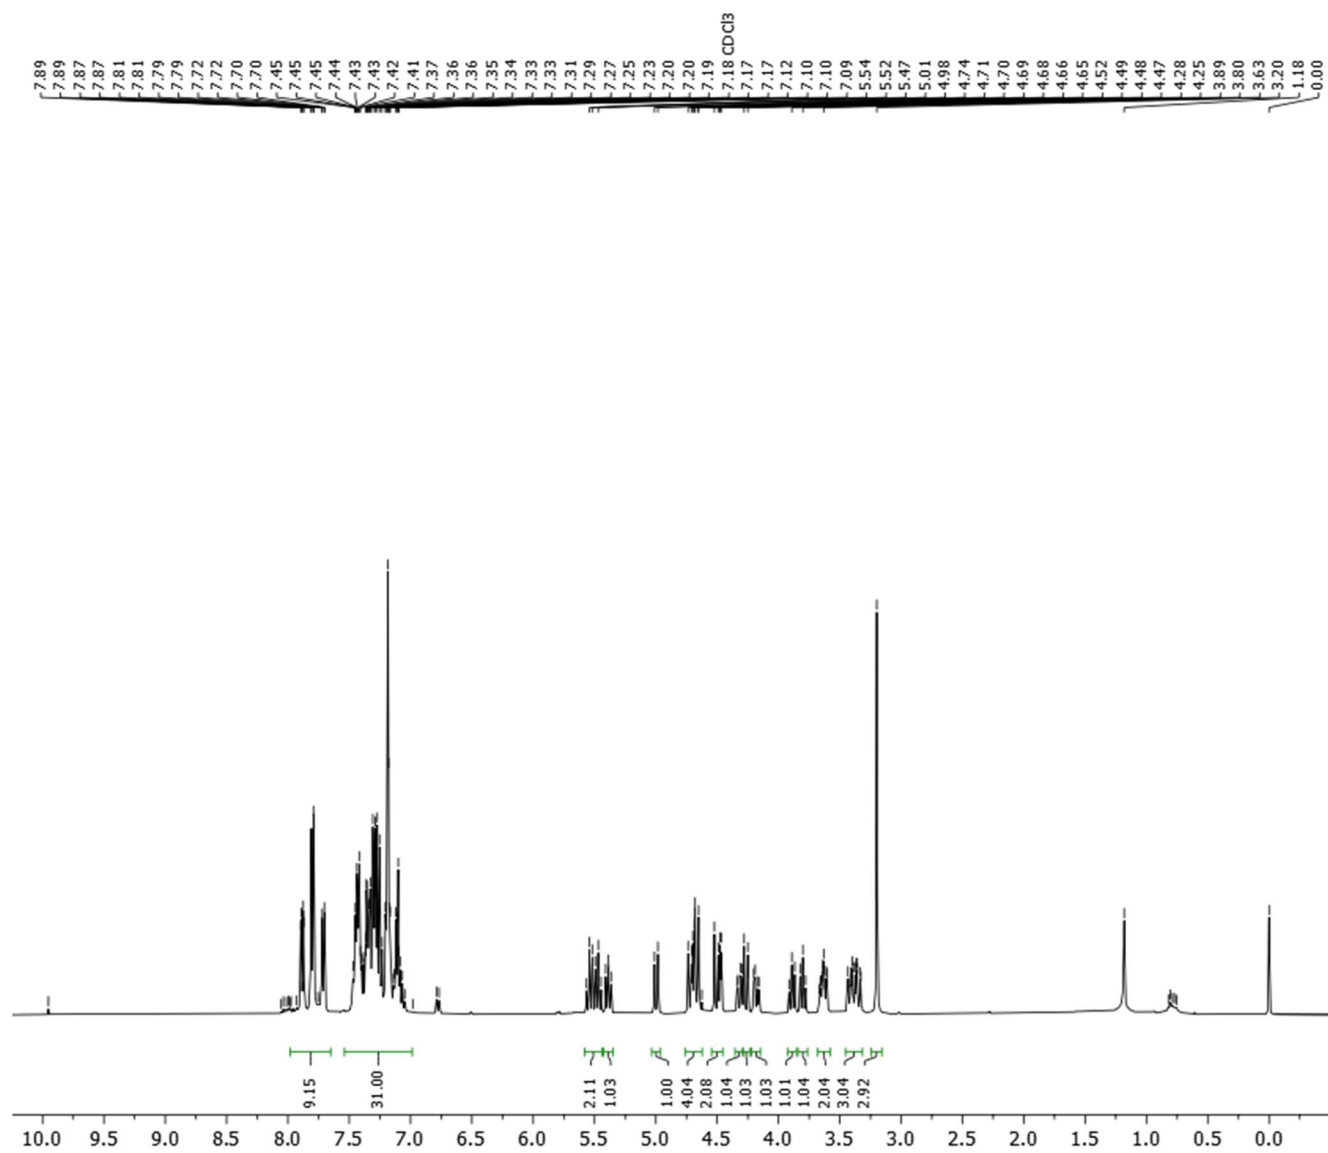

$^1\text{H}$  NMR (400 MHz,  $\text{CDCl}_3$ )

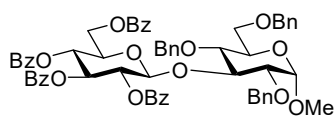

12

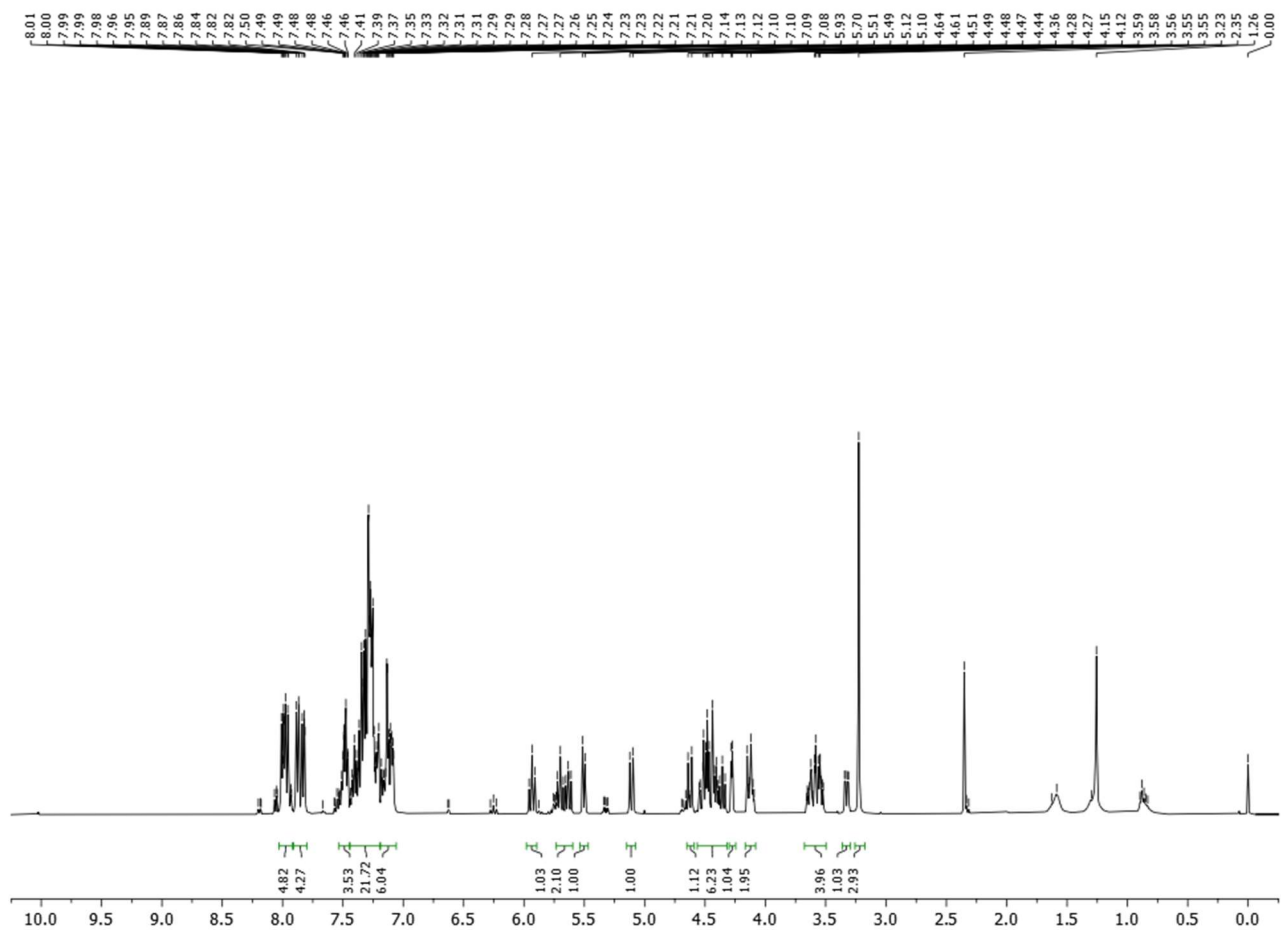

$^1\text{H}$  NMR (400 MHz,  $\text{CDCl}_3$ )

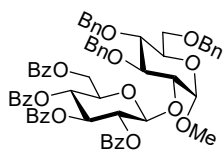

14

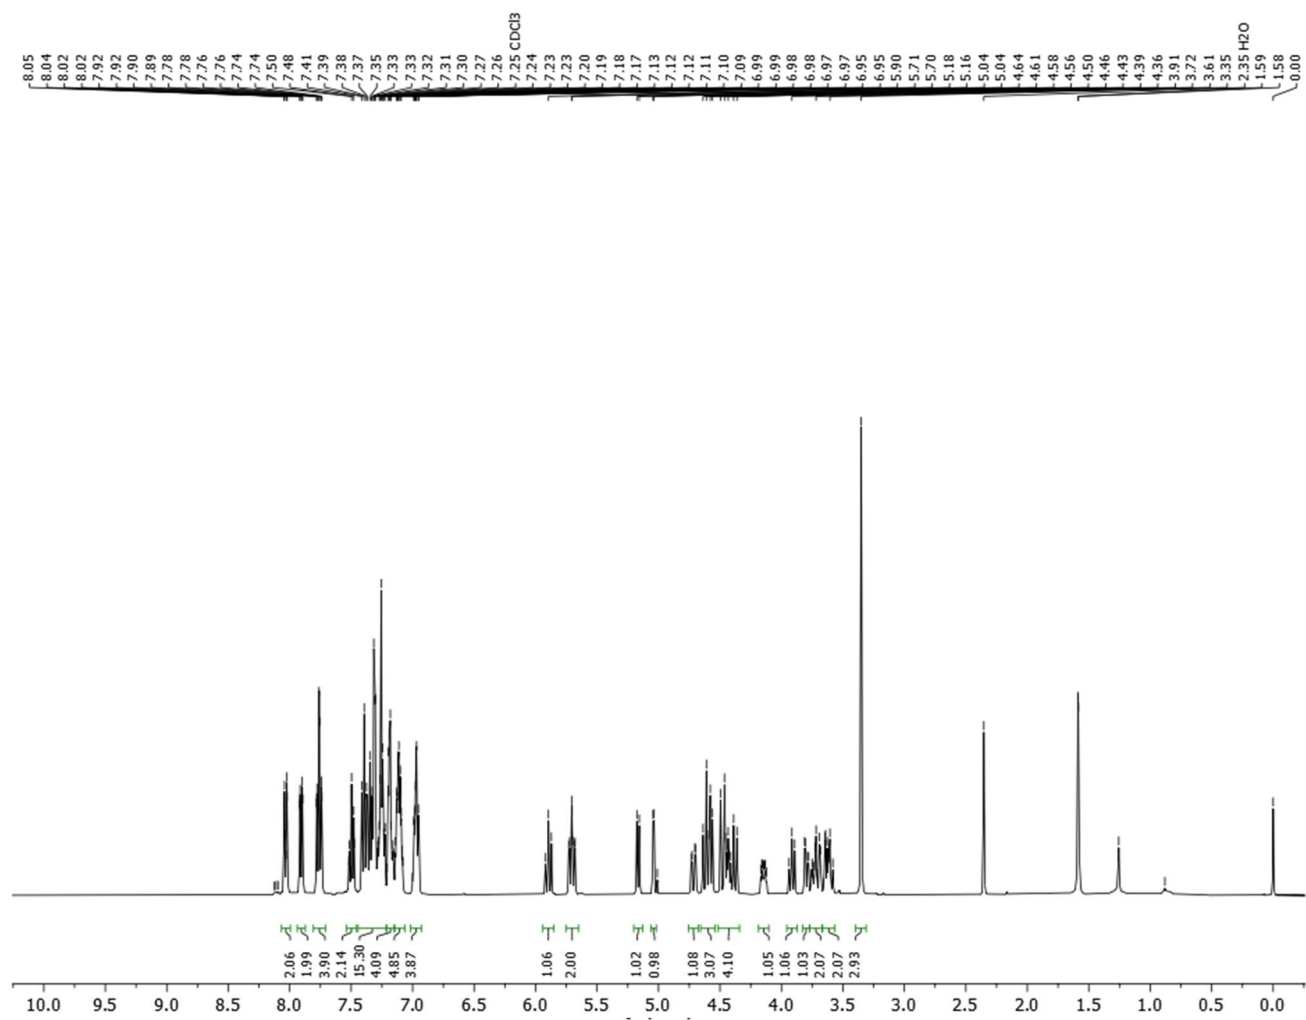

<sup>1</sup>H NMR (400 MHz, CDCl<sub>3</sub>)

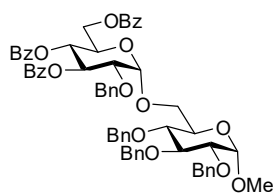

15

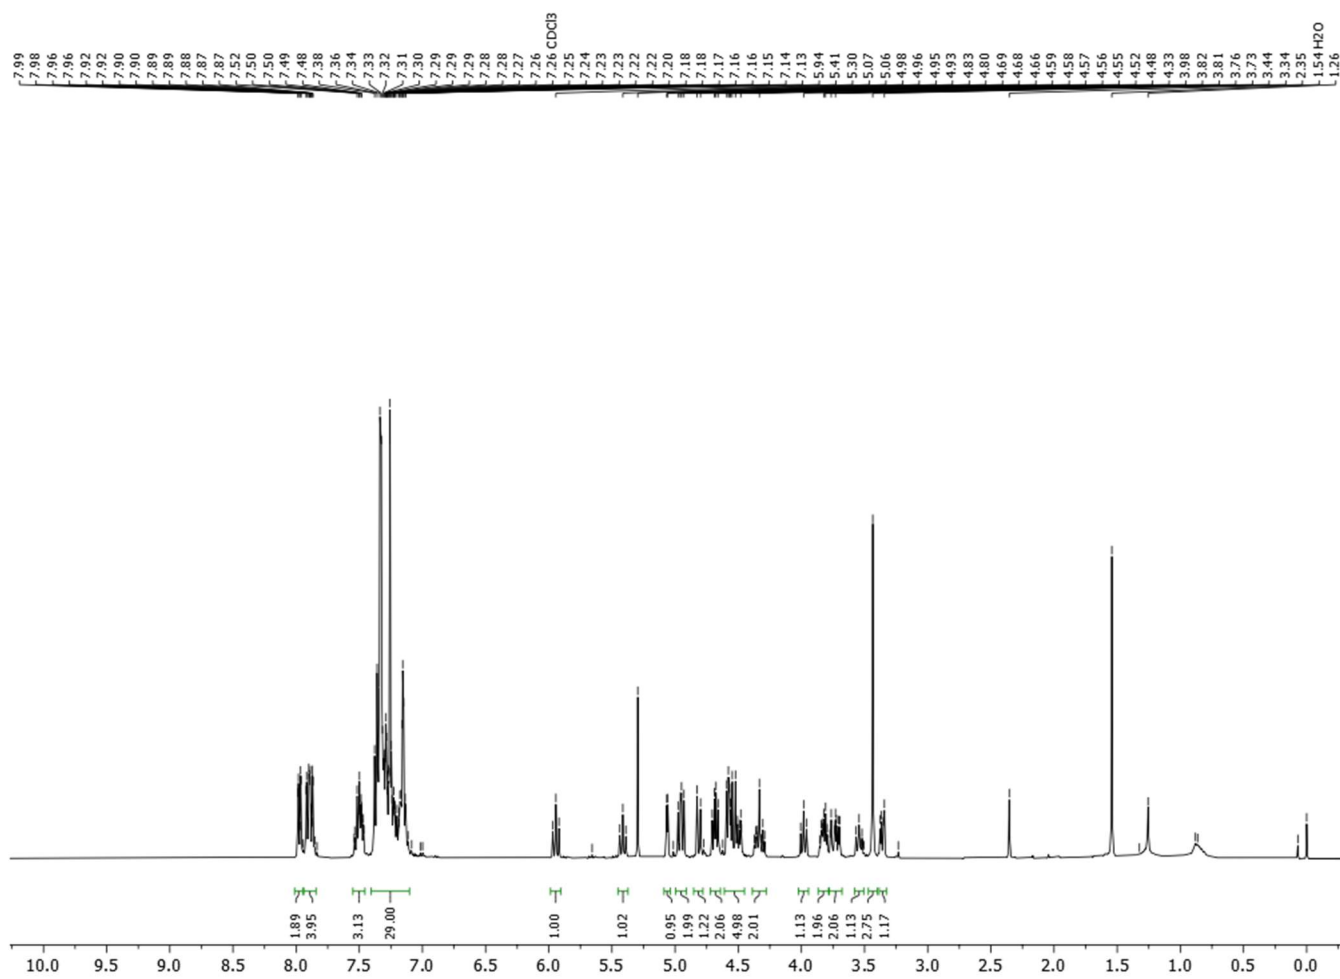

<sup>1</sup>H NMR (400 MHz, CDCl<sub>3</sub>)

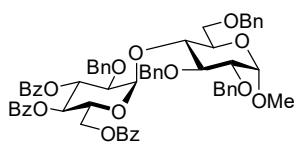

16

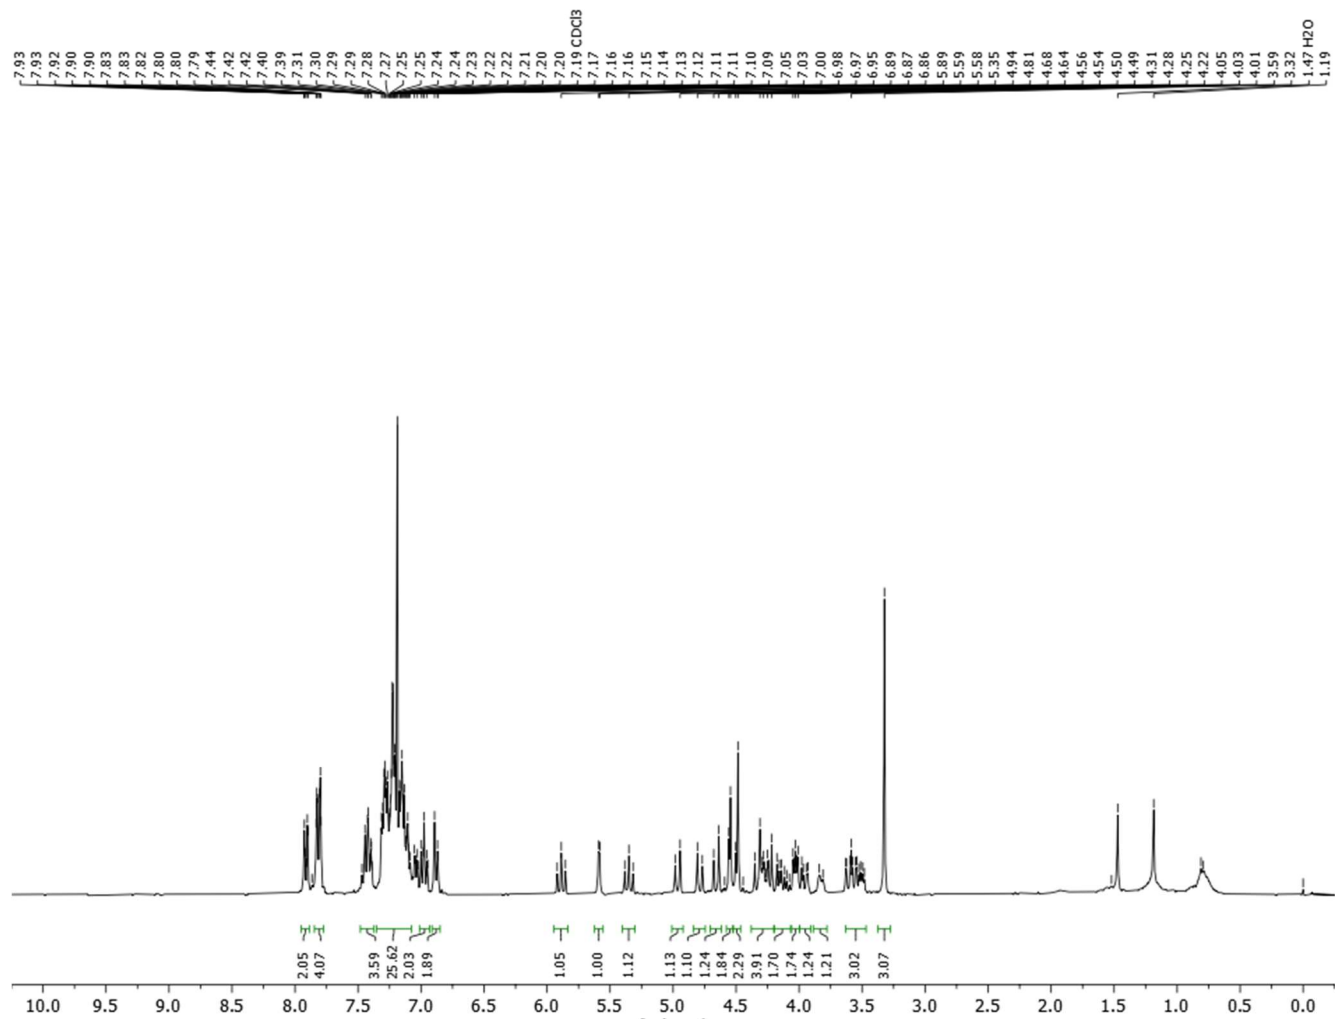

<sup>1</sup>H NMR (400 MHz, CDCl<sub>3</sub>)

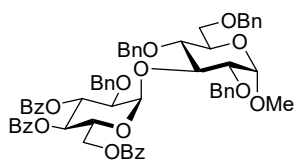

17

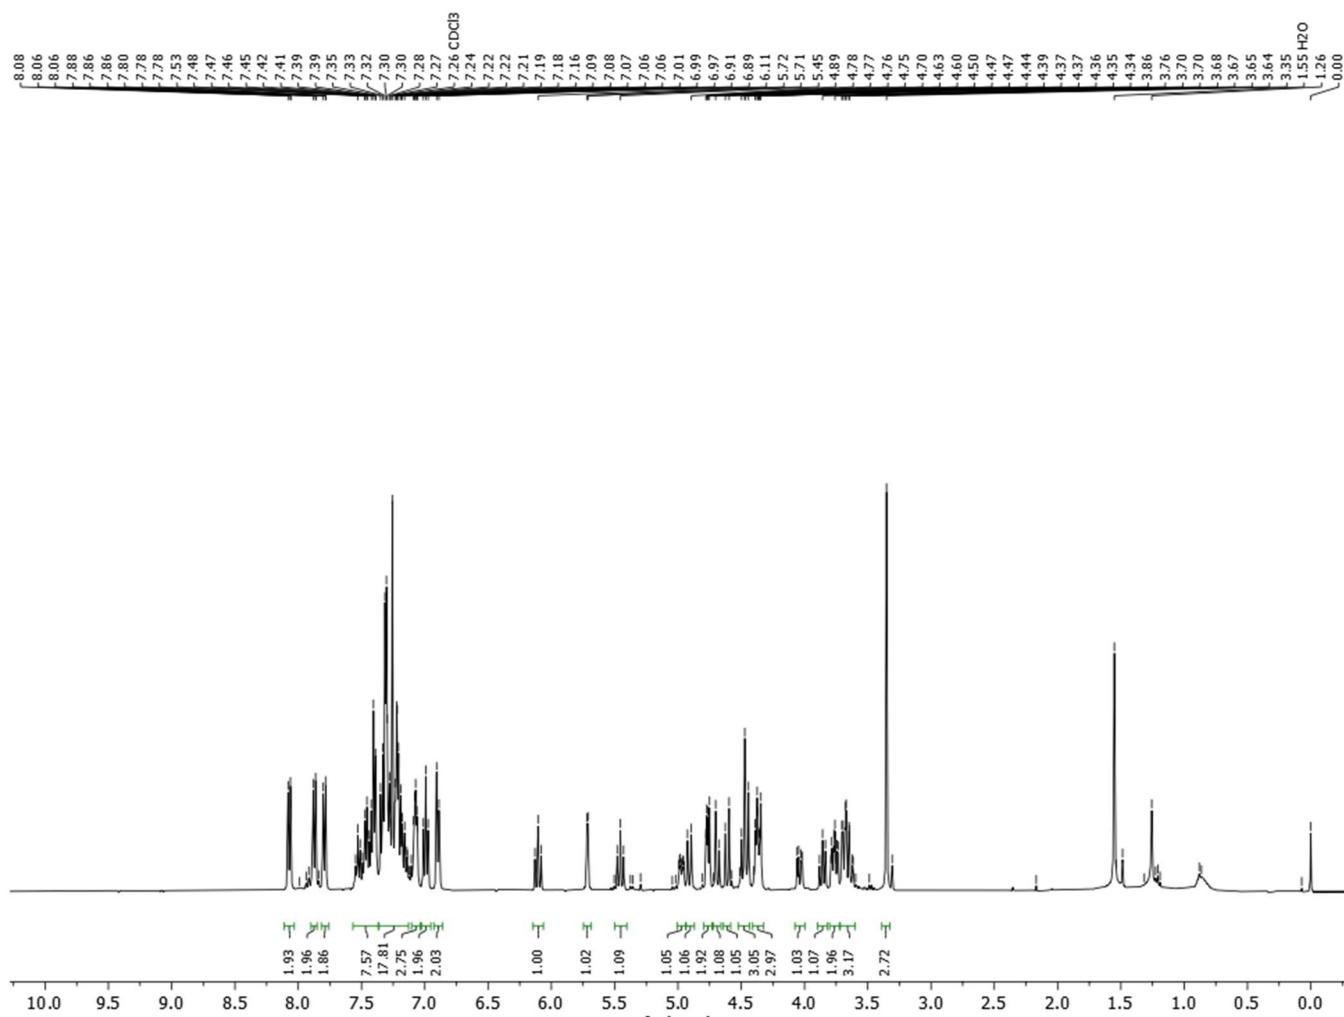

$^1\text{H}$  NMR (400 MHz,  $\text{CDCl}_3$ )

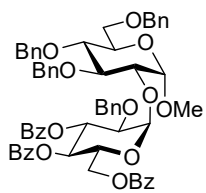

18

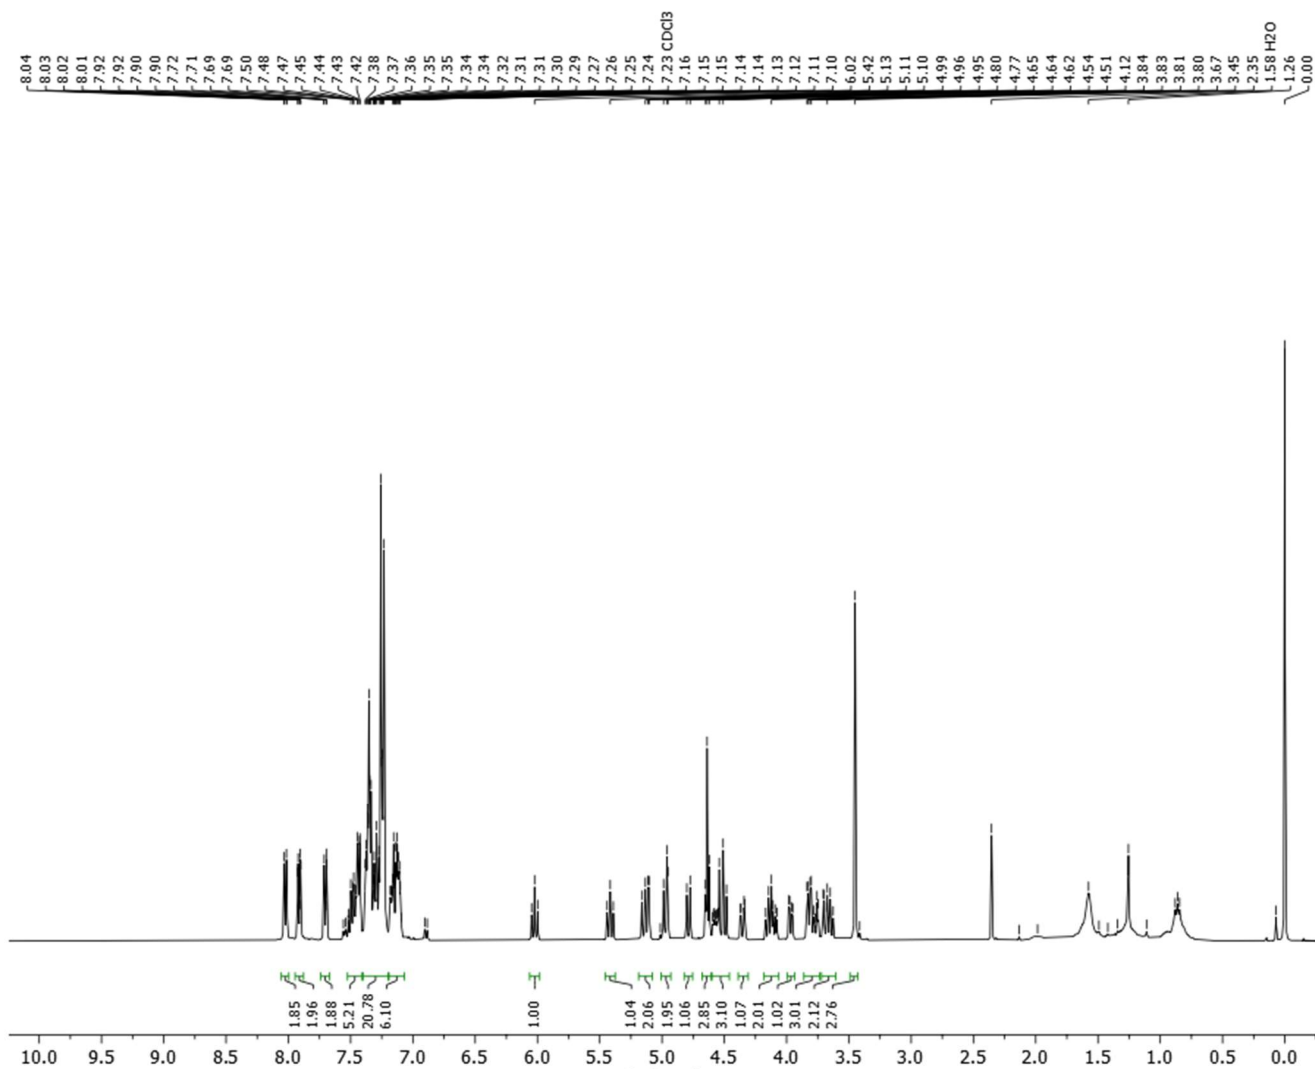

$^1\text{H}$  NMR (400 MHz,  $\text{CDCl}_3$ )



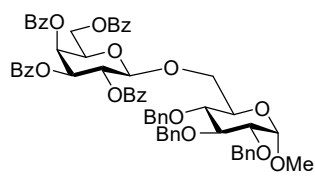

19

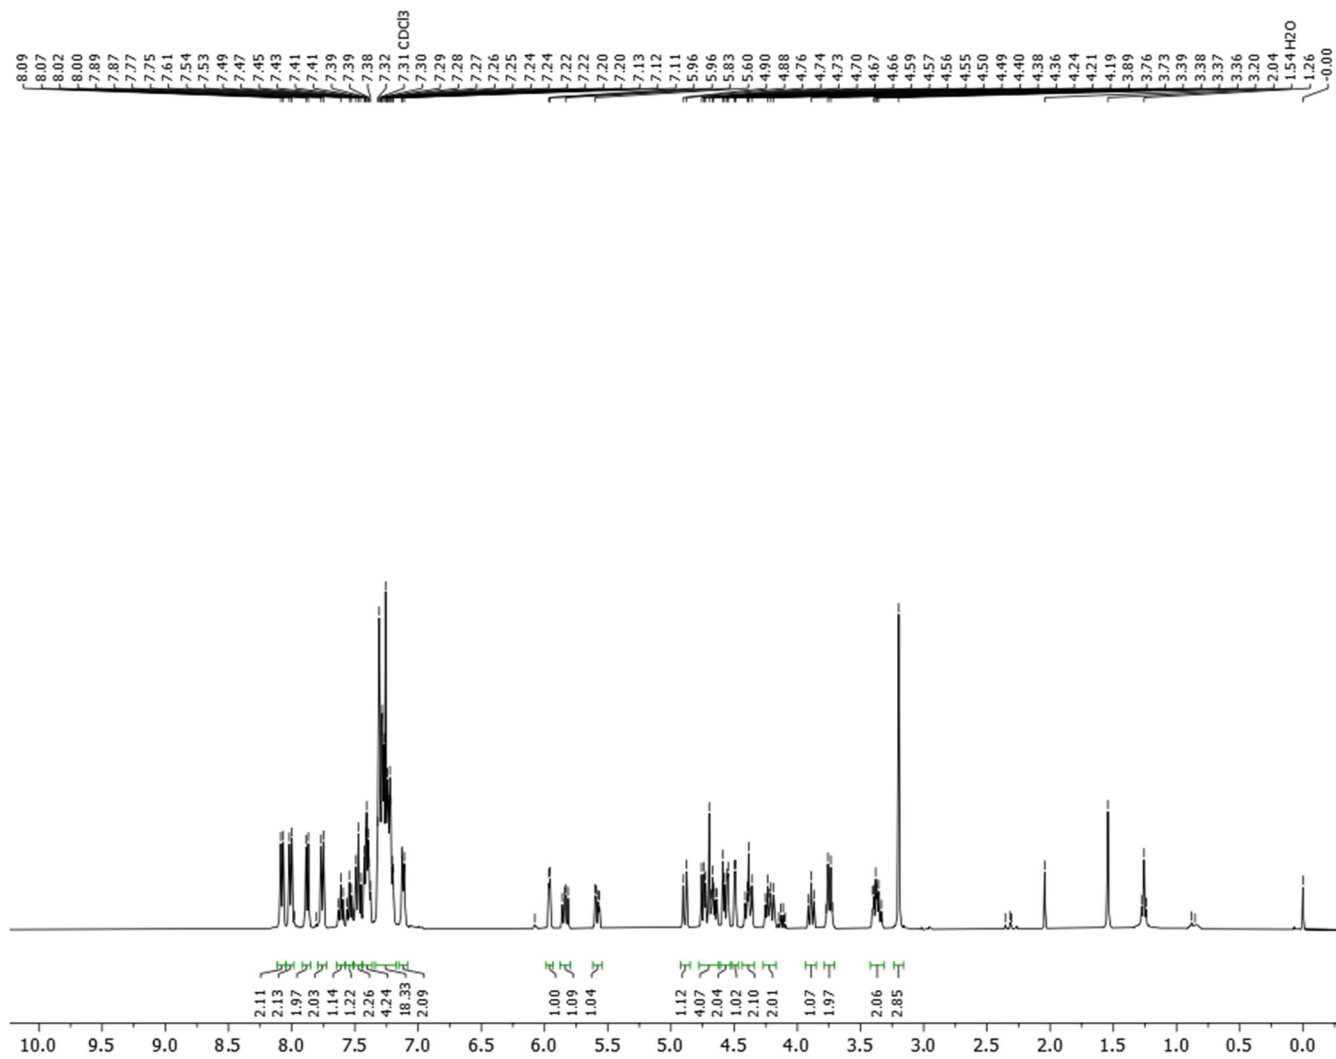

$^1\text{H}$  NMR (400 MHz,  $\text{CDCl}_3$ )

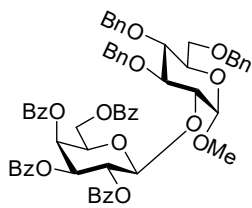

20

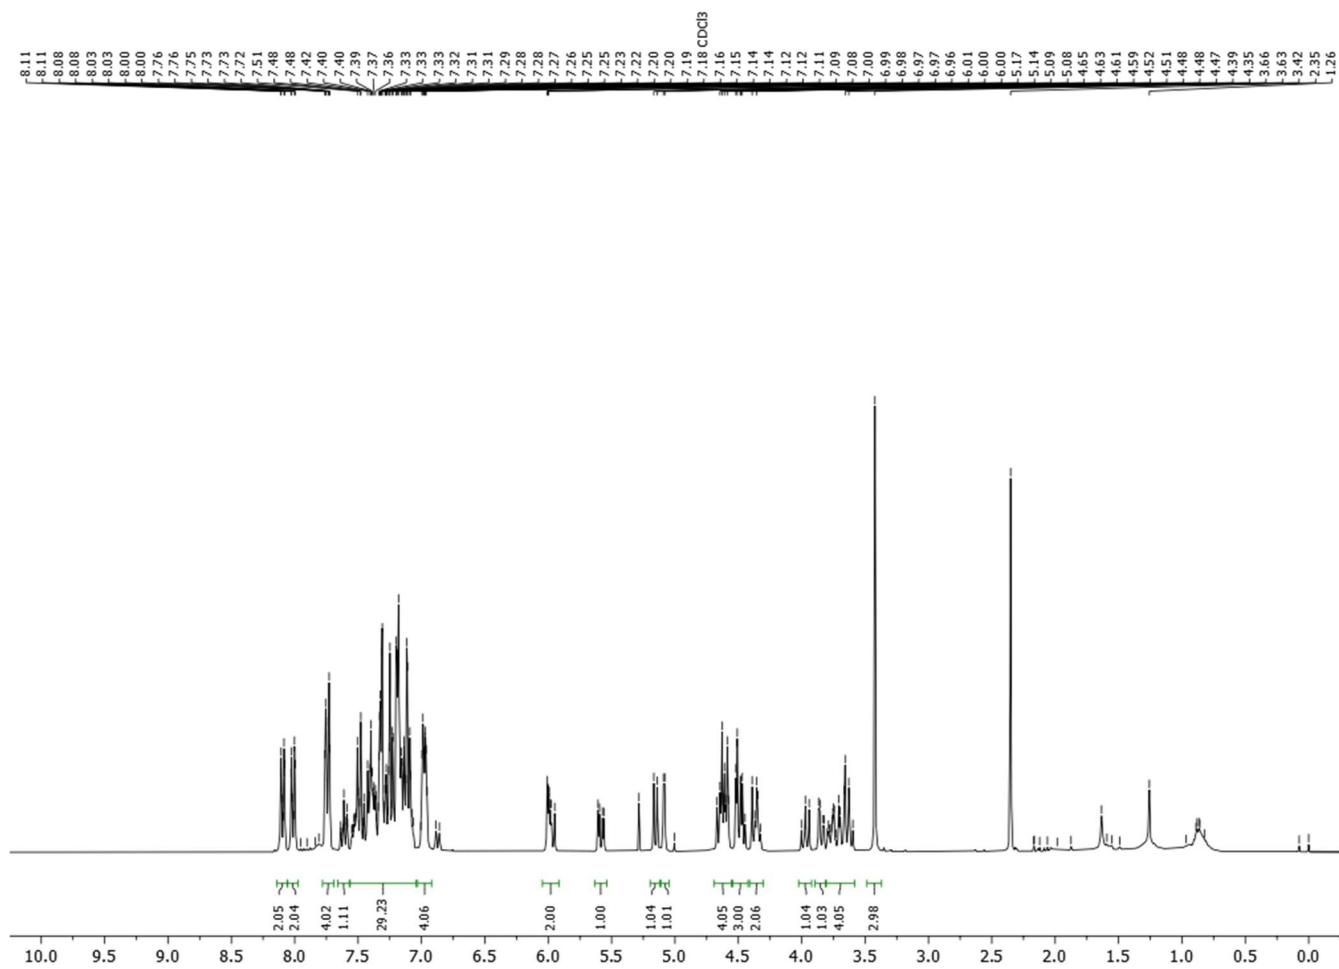

<sup>1</sup>H NMR (400 MHz, CDCl<sub>3</sub>)
